# Supplementary material for: Characterization and reactivity study of non-heme high-valent iron–hydroxo complexes
Source: Royal Society of Chemistry journal article supplement (doi:10.1039/d0sc07054h), 2021-01-01
Supplement: d0sc07054h1.pdf [file d0sc07054h1.pdf]

## Supporting Information for

# Characterization and Reactivity Study of Non-Heme High-Valent Iron–Hydroxo Complexes

Kritika Keshari,<sup>[a]</sup> Moumita Bera,<sup>[a]</sup> Lucía Velasco,<sup>[b]</sup> Sandip Munshi,<sup>[c]</sup> Geetika Gupta,<sup>[a]</sup>  
Dooshaye Moonshiram\*<sup>[b]</sup>, and Sayantan Paria\*<sup>[a]</sup>

<sup>a</sup>Department of Chemistry, Indian Institute of Technology Delhi, Hauz Khas, New Delhi-110016

<sup>b</sup>Instituto Madrileño de Estudios Avanzados en Nanociencia (IMDEA Nanociencia), Calle Faraday, 9,  
28049 Madrid, Spain.

<sup>c</sup>School of Chemical Sciences, Indian Association for the Cultivation of Science, 2A & 2B Raja S. C.  
Mullick Road, Jadavpur, Kolkata 700032

## Experimental Section

All of the chemicals used in this study were purchased from commercial sources like Sigma-Aldrich, TCI India, Alfa Aesar, Avra Synthesis, Spectrochem, and used as received. *Tris*(4-bromophenyl)ammoniumyl hexachloroantimonate (TBAH) was purchased from Sigma-Aldrich. Iron(III) perchlorate hydrate, tetramethylammonium hydroxide as 25% solution in methanol were purchased from Alfa Aesar and used as received. Anhydrous methanol and anhydrous acetonitrile were purchased from Sigma Aldrich, further deoxygenated by freeze-pump-thaw techniques and kept inside glovebox for use. Diethyl ether, hexane, benzene and tetrahydrofuran were purified over sodium/benzophenone, and deoxygenated by freeze-pump-thaw techniques. Isotope labelled water ( $\text{H}_2\text{O}^{18}$ ) was purchased from Cambridge Isotope Laboratories, Inc. Synthesis and manipulation of the iron complex were performed either in a nitrogen filled glovebox (Vigor Tech) or using standard Schlenk techniques. Gomberg's dimer was synthesized according to the literature procedure.<sup>1</sup> Oxidation potential of 4-X-2,6-di-*tert*-butylphenols ( $X = -\text{OCH}_3, -\text{CH}_3, -\text{CH}_2\text{CH}_3, -\text{C}(\text{CH}_3)_3, -\text{H}$ ) were taken from Karlin *et al.*<sup>2</sup> The  $\sigma_p^+$  values were taken from Hansch *et al.*<sup>3</sup>

**NMR Spectroscopy.** NMR spectra were recorded in a Bruker 500 MHz (DPX-500) or Bruker 400 MHz (DPX-400) NMR spectrometers. All chemical shifts are reported with respect to tetramethylsilane (TMS) as the internal standard.  $^1\text{H}$  NMR spectra of **1** & **2** were recorded as follows:

A 500  $\mu\text{L}$  of a 11.5 mM solution of complex **1** in  $\text{CD}_3\text{CN}$  was poured in an NMR tube inside the glove box and sealed with a septum. The  $^1\text{H}$  NMR spectrum of **1** was recorded in a 400 MHz instrument at 25  $^\circ\text{C}$ . Once the measurement is done, the NMR tube was taken out of the instrument and cooled in an acetone bath at  $-30$   $^\circ\text{C}$ . A 50  $\mu\text{L}$  solution of TBAH (115 mM) in  $\text{CD}_3\text{CN}$ , was slowly introduced in the NMR tube containing complex **1** and nitrogen gas was bubbled through a needle for a while to make the solution homogeneous and wait for 10 minutes to complete the reaction. The outside of the NMR tube was quickly wiped with a tissue paper and introduced in the precooled NMR probe and data was collected.

### Evans' Method.

A 500  $\mu\text{L}$  of a 13 mM solution of **1** in  $\text{CD}_3\text{CN}$  containing HMDS (internal standard) was introduced in a Wilmad screw-cap NMR tube. In a Wilmad coaxial insert stem, HMDS in  $\text{CD}_3\text{CN}$  was filled. The coaxial was then slowly introduced in the screw-cap NMR tube. The  $^1\text{H}$  NMR spectrum of the complex solution was taken at 298 K (Figure S5). Paramagnetic susceptibility of the iron complex was calculated using the following formula<sup>4</sup>:

$$\chi_p = \chi_0 + 3000\Delta\nu/4\pi\nu_0cM$$

Where,  $\chi_0$  = diamagnetic susceptibility,  $\Delta\nu$  = frequency shift of the  $\text{CH}_3$  protons of HMDS in Hz,  $\nu_0$  = frequency of the NMR instrument in Hz,  $c$  = concentration of the iron complex,  $M$  = molecular weight.

Diamagnetic susceptibility because of the iron complex, counter cations and solvents were deducted from the measured magnetic moment value to get paramagnetic susceptibility. Molar paramagnetic susceptibility was determined from the  $\chi_p$  value and molecular weight of iron complex. Effective magnetic moment ( $\mu_{\text{eff}}$ ) of **1** was calculated using the following equation<sup>5</sup>:

$$\mu_{\text{eff}} = (3k_{\text{B}}\chi_{\text{P}}T/N_{\text{A}}\beta^2)^{1/2} = (8 \times \chi_{\text{P}} \times T)^{1/2}$$

Where,  $k_{\text{B}}$  = Boltzmann's constant,  $T$  = Temperature,  $N_{\text{A}}$  = Avogadro's number,  $\beta$  = Bohr magneton. The ratio of  $3k_{\text{B}}/N_{\text{A}}\beta^2 \approx 8$ .

In a similar way, the magnetic moment of the intermediate (**2**) was determined. A 500  $\mu\text{L}$  of a 13 mM solution of **1** containing HMDS was prepared in  $\text{CD}_3\text{CN}$  and was introduced in a Wilmad screw-cap NMR tube under  $\text{N}_2$  atmosphere and the solution was cooled in a constant temperature bath at around  $-30\text{ }^\circ\text{C}$ . One equiv. of TBAH was introduced into the NMR tube and  $\text{N}_2$  gas was bubbled for a while to make the solution homogeneous at  $-30\text{ }^\circ\text{C}$ . After formation of **2**, a coaxial containing HMDS was quickly inserted in the NMR tube and sealed. The shift of  $^1\text{H}$  NMR signal of HMDS was then measured. Effective magnetic moment ( $\mu_{\text{eff}}$ ) of **2** was estimated in a similar way as described above.

**Magnetic Susceptibility Measurement.** Magnetic susceptibility of **1** over a temperature range 4–300K was measured in a Physical Property Measurement System (PPMS) from Cryogenic Limited, UK. During the measurement, a 2 T magnetic field was applied. Diamagnetic correction from the sample as well as sample holder was applied during analysis of the data.

**Mass Spectrometry.** ESI-mass spectra were recorded in a Bruker Micro-TOF QII spectrometer. GC-mass spectra of the organic compounds were measured in an Agilent 7890B GC system fitted with a FID detector and Agilent 5977B GC/MSD mass detector.

**Infrared Spectroscopy.** Fourier transform infrared spectrum of complex **1** was measured on KBr pellets in a Nicolet protégé 460 ESP instrument.

**CHN analysis.** Elemental analysis of complex **1** was performed in a PerkinElmer's 2400 Series II CHNS/O System.

**Electrochemistry.** Cyclic voltammetry (CV) and differential pulse voltammograms (DPV) were measured in a CH Instrument (CHI 760E, CH Instrument, USA) using glassy carbon (ID: 3 mm diameter) as working electrode, Pt wire as counter electrode, and Ag/AgCl (in saturated KCl) as the reference electrode. A 0.6 mM solution of **1** in acetonitrile containing 60 mM tetrabutylammonium hexafluorophosphate as counter electrolyte was used. All the electrochemical measurements were performed under nitrogen atmosphere using deoxygenated acetonitrile.

**EPR Spectroscopy.** EPR spectra of the complexes were recorded in a Bruker EPR spectrometer (Biospin, EMXmicro A200).

In a typical experiment, a 400  $\mu\text{L}$  of a 0.5 mM solution of complex **1** in acetonitrile was introduced in an EPR tube inside a nitrogen filled glovebox. The tube was taken outside of the glovebox, frozen in liquid nitrogen and inserted in the cavity of the EPR instrument precooled at 100K. Once the measurement was over, the sample tube was warmed to approx.  $-25\text{ }^\circ\text{C}$  in an acetone bath, followed by 30  $\mu\text{L}$  of a 6.6 mM solution of TBAH (one equiv.) was inserted into the EPR tube and the reaction solution was homogenised by bubbling nitrogen gas into the solution. The EPR tube was further reinserted in the cavity of the instrument and the measurement was conducted at 100K.

**UV-Vis Spectroscopy.** UV-Vis spectra were collected in an Agilent 8454 Diode array spectrophotometer fitted with a low temperature cryostat (UNISOKU, Japan). In a typical experiment, a 3 mL of a 0.25 mM solution of complex **1** in acetonitrile was taken in a 1 cm pathlength cuvette inside the glovebox. Then, the cuvette was taken out from the glovebox and placed inside the cryostat where the temperature of holder fixed at  $-25\text{ }^{\circ}\text{C}$  (or  $-45\text{ }^{\circ}\text{C}$ ). The temperature of the reaction solution was allowed to equilibrate for 5 minutes. A 50  $\mu\text{L}$  solution of TBAH (15 mM) in acetonitrile was introduced in the cuvette and single spectra of the reaction solution was measured continuously while stirring the reaction solution. The formation of the complex **2** was monitored at 470 and 680 nm. After complete formation of the intermediate (**2**), desired amount of substrate (20–100  $\mu\text{L}$ , 4-X-2,6-di-*tert*-butylphenol or Gomberg's dimer) was introduced into the reaction solution and reaction was monitored at 470 nm by UV-Vis spectroscopy under pseudo-first-order or second order reaction condition. The second order rate constants were obtained plotting  $k_{\text{obs}}$  vs [substrate] or  $(A_0 - A)/(C_0)(A - A_{\infty})$  vs. time (s) for pseudo-first-order or second-order reactions, respectively.

The  $\text{PK}_a$  value of **2** was determined by spectrophotometric titration using pyrrolidine as a base. We used a similar experimental procedure as described in the literature.<sup>6</sup>

### **X Ray structure determination.**

Crystals of complex **1** suitable for single-crystal X-ray diffraction studies were selected from the mother liquor and immersed in Paratone oil followed by mounting on a nylon loop under a 100 K nitrogen cold stream. Data collections were performed on a Bruker D8 VENTURE Microfocus diffractometer equipped with PHOTON II Detector, with Mo  $\text{K}\alpha$  radiation ( $\lambda = 0.71073\text{ \AA}$ ), controlled by the APEX III (v2017.3–0) software package. The raw data were integrated and corrected for Lorentz and polarization effects with the aid of the Bruker APEX III program suite.<sup>7</sup> Absorption corrections were performed by using SADABS. Structures were solved by the intrinsic phasing method and refined against all data in the reported  $2\theta$  ranges by full-matrix least squares method based on F2 using the SHELXL program suite<sup>8</sup> with all observed reflections. Hydrogen atoms at idealized positions were included in final refinements. The non-hydrogen atoms were treated anisotropically. Diagrams for the complexes were prepared using ORTEP.<sup>9</sup> and Mercury software.<sup>10</sup> Crystallographic data of complex **1** is given in Table S1 and bond parameters are mentioned in Table S2. CCDC number 2018882 contain crystallographic data of complex **1**.

**Table S1.** Summary of X-ray crystallographic data of complex **1**• 2H<sub>2</sub>O.

|                                                 | <b>1</b>                                                        |
|-------------------------------------------------|-----------------------------------------------------------------|
| Empirical formula                               | C <sub>22</sub> H <sub>45</sub> FeN <sub>4</sub> O <sub>7</sub> |
| Formula weight                                  | 533.47                                                          |
| Crystal system                                  | Monoclinic                                                      |
| Space group                                     | <i>P2(1)/c</i>                                                  |
| <i>a</i> (Å)                                    | 13.571(4)                                                       |
| <i>b</i> (Å)                                    | 11.046(4)                                                       |
| <i>c</i> (Å)                                    | 19.406(6)                                                       |
| $\alpha$ (deg.)                                 | 90                                                              |
| $\beta$ (deg.)                                  | 102.992(11)                                                     |
| $\gamma$ (deg.)                                 | 90                                                              |
| Volume (Å <sup>3</sup> )                        | 2834.6(17)                                                      |
| <i>Z</i>                                        | 4                                                               |
| <i>D</i> <sub>calcd.</sub> (mg/m <sup>3</sup> ) | 1.250                                                           |
| $\mu$ Mo-K $\alpha$ (mm <sup>-1</sup> )         | 0.575                                                           |
| <i>F</i> (000)                                  | 1148                                                            |
| $\theta$ range (deg.)                           | 2.771–33.535                                                    |
| Reflections collected                           | 38789                                                           |
| Reflections unique                              | 10231                                                           |
| <i>R</i> (int)                                  | 0.0783                                                          |
| Data ( <i>I</i> >2 $\sigma$ ( <i>I</i> ))       | 7340                                                            |
| Parameters refined                              | 339                                                             |
| Goodness-of-fit on <i>F</i> <sup>2</sup>        | 1.067                                                           |
| <i>R</i> 1 [ <i>I</i> >2 $\sigma$ ( <i>I</i> )] | 0.0617                                                          |
| <i>wR</i> 2                                     | 0.1573                                                          |

**Table S2.** Important bond length (Å) and bond angles (°) for complex **1**.

|                 |            |                 |           |
|-----------------|------------|-----------------|-----------|
| Fe(1)–O(1)      | 1.9093(17) | O(1)–Fe(1)–N(1) | 109.61(8) |
| Fe(1)–O(2)      | 1.9273(17) | O(3)–Fe(1)–O(2) | 103.64(7) |
| Fe(1)–O(3)      | 1.9222(16) | O(3)–Fe(1)–N(2) | 80.71(7)  |
| Fe(1)–N(1)      | 2.0684(18) | O(3)–Fe(1)–N(1) | 137.84(7) |
| Fe(1)–N(2)      | 2.0724(18) | O(2)–Fe(1)–N(2) | 147.36(7) |
| O(1)–Fe(1)–O(3) | 108.77(7)  | O(2)–Fe(1)–N(1) | 80.20(7)  |
| O(1)–Fe(1)–O(2) | 108.24(8)  | N(1)–Fe(1)–N(2) | 75.80(7)  |
| O(1)–Fe(1)–N(2) | 100.52(7)  |                 |           |

## X-ray Absorption Spectroscopy

### 1. X-ray Absorption Near Edge (XANES) and Extended X-ray Absorption Fine Structure (EXAFS) Measurements

X-ray absorption spectra on complexes **[1]** and **[2]** were carried out at the Petra P64 beamline<sup>11</sup> (Hamburg, Germany) at electron energy 7.1 KeV and average current 100 mA. The radiation was monochromatized by a Si(111) crystal monochromator. The intensity of the X-ray was monitored by three ion chambers ( $I_0$ ,  $I_1$  and  $I_2$ ) filled with 70% nitrogen and 30% helium and placed before the sample ( $I_0$ ) and after the sample ( $I_1$  and  $I_2$ ). A Fe metal foil was placed between the  $I_1$  and  $I_2$  and its absorption recorded with each scan for energy calibration. Plastic (PEEK) EXAFS sample holders (inner dimensions of 12 mm x 3 mm x 3mm) filled with the frozen solutions of **[1]** and **[2]** were inserted into a pre-cooled (20 K) cryostat and kept in a He atmosphere at ambient pressure. The XAS data was in this case recorded as fluorescence excitation spectra using a 4-element silicon drift detector. The Fe XAS energy was calibrated by the first maximum of the second derivative of the Fe metal XANES spectrum. A total of 8-10 scans were collected for complexes **[1]** and **[2]**. In order to reduce the risk of sample damage by X-ray radiation, no more than 2 scans were taken at each sample position in any conditions. No radiation damage was observed to any of the two samples scan after scan.

### 2. EXAFS Data Analysis

Athena software<sup>12</sup> was used for data processing. The energy scale for each scan is normalized using the iron metal standard and scans made for the same samples were added. Data in energy space are pre-edge corrected, normalized, and background corrected. The processed data are next converted to the photoelectron wave vector ( $k$ ) space and weighted by  $k^2$ . The electron wave number is defined as  $k = [2m(E - E_0)/\hbar^2]^{1/2}$ ,  $E_0$  is the energy origin or the threshold energy.  $k$ -space data were truncated near the zero crossings ( $k = 2$  to  $14.107 \text{ \AA}^{-1}$ ) in Fe EXAFS before Fourier transformation. The  $k$ -space data were then transferred into the Artemis Software for curve fitting. In order to fit the data, the Fourier peaks are isolated separately, grouped together, or the entire (unfiltered) spectrum was used. The individual Fourier peaks were isolated by applying a Hanning window to the first and last 15% of the chosen range, leaving the middle 70% untouched. Curve fitting is performed using *ab initio*-calculated phases and amplitudes from the FEFF8<sup>13</sup> program and *ab initio*-calculated phases and amplitudes are used in the EXAFS equation<sup>14</sup>

$$\chi(k) = S_0^2 \sum_j \frac{N_j}{kR_j^2} f_{\text{eff}_j}(\pi, k, R_j) e^{-2\sigma_j^2 k^2} e^{\frac{-2R_j}{\lambda_j(k)}} \sin(2kR_j + \phi_j(k)) \quad (\text{S1})$$

where  $N_j$  is the number of atoms in the  $j^{\text{th}}$  shell;  $R_j$  the mean distance between the absorbing atom and the atoms in the  $j^{\text{th}}$  shell;  $f_{\text{eff}_j}(\pi, k, R_j)$  is the *ab initio* amplitude function for shell  $j$ , and the Debye-Waller term  $e^{-2\sigma_j^2 k^2}$  accounts for damping due to static and thermal disorder in absorber-backscatterer distances. The mean free path term  $e^{\frac{-2R_j}{\lambda_j(k)}}$  reflects losses due to inelastic scattering, where  $\lambda_j(k)$  is the electron mean free path. The oscillations in the EXAFS spectrum are reflected in the sinusoidal term  $\sin(2kR_j + \phi_j(k))$ , where  $\phi_j(k)$  is the *ab initio* phase function for shell  $j$ . This sinusoidal term shows the direct relation between the frequency of the EXAFS oscillations in k-space and the absorber-back scatterer distance.  $S_0^2$  is an amplitude reduction factor.

The EXAFS equation (Eq. S1) is used to fit the experimental Fourier isolated data (in q-space) as well as unfiltered data (in k-space) and Fourier transformed data (in R-space) using  $N$ ,  $S_0^2$ ,  $E_0$ ,  $R$ , and  $\sigma^2$  as variable parameters.  $N$  refers to the number of coordination atoms surrounding Fe for each shell. The quality of fit is evaluated by R-factor and the reduced  $\chi^2$  value. The deviation in  $E_0$  was required to be less than or equal to 10 eV. An R-factor less than 2% denotes that the fit is good enough whereas an R-factor between 2 and 5% denotes that the fit is correct within a consistently broad model<sup>14</sup>. The reduced  $\chi^2$  value is used to compare fits as more absorber-backscatter shells are included to fit the data. A smaller reduced  $\chi^2$  value indicates a better fit. Similar results were obtained from fits done in k, q, and R-spaces.

**Table S3.** EXAFS Fits parameters

| Complex                     | Fit      | Region      | Shell, N                                                 | R, Å                                                   | $E_0$                  | ss. <sup>2</sup><br>(10 <sup>-3</sup> )                    | R-factor      | Reduced<br>Chi-square |
|-----------------------------|----------|-------------|----------------------------------------------------------|--------------------------------------------------------|------------------------|------------------------------------------------------------|---------------|-----------------------|
| <b>1</b>                    | 1        | I           | Fe-N/O, 5                                                | 1.95                                                   | -1.0                   | 9.2                                                        | 0.0442        | 8664                  |
|                             | 2        | I           | Fe-O, 3<br>Fe-N, 2                                       | 1.88<br>2.03                                           | -2.7                   | 2.5                                                        | 0.0035        | 1227                  |
|                             | <b>3</b> | <b>I,II</b> | <b>Fe-O,3<br/>Fe-N,2<br/>Fe-C,6<br/>Fe-C-<br/>N/O,16</b> | <b>1.88 (1)<br/>2.04 (1)<br/>2.90 (2)<br/>3.17 (1)</b> | <b>-0.77<br/>(1.3)</b> | <b>3.7 (1.3)<br/>1.3 (0.8)<br/>6.8 (2.0)<br/>1.4 (1.2)</b> | <b>0.0039</b> | <b>813</b>            |
| Ligand<br>Oxidized <b>2</b> | 4        | I           | Fe-N/O,5                                                 | 1.94                                                   | -0.9                   | 14.6                                                       | 0.0217        | 4911                  |
|                             | 5        | I           | Fe-O,3<br>Fe-N,2                                         | 1.91<br>2.10                                           | 1.7                    | 6.7<br>4.4                                                 | 0.0163        | 6539                  |
|                             | <b>6</b> | <b>I,II</b> | <b>Fe-O,3<br/>Fe-N,2<br/>Fe-C,6<br/>Fe-C-<br/>N/O,16</b> | <b>1.89 (2)<br/>2.09 (2)<br/>2.87 (2)<br/>3.12 (2)</b> | <b>0.72<br/>(2.1)</b>  | <b>6.7 (1.7)<br/>4.3 (2.3)<br/>6.0 (1.4)<br/>7.1 (5.0)</b> | <b>0.0055</b> | <b>1176</b>           |

\* The amplitude reduction factor  $S_0^2$  was fixed to 1. Region I refers to the EXAFS spectra region between apparent distances 1.1-2.1 Å whereas Regions I and II refer to that between 1.1-3 Å. Fits 3 and 6 for the entire spectrum are highlighted in bold in table S3 above. The numbers in brackets refers to the error bars which range in the order of 0.02-0.03 Å in the extracted bond distances.

**Table S4.** A comparison of the bond lengths (Å) of **1** obtained from XRD and EXAFS measurements.

| <b>Bonds</b> | <b>X-ray Structure</b> | <b>EXAFS</b> |
|--------------|------------------------|--------------|
| Fe(1)–O(1)   | 1.9093(17)             | 1.88(1)      |
| Fe(1)–O(2)   | 1.9273(17)             | 1.88(1)      |
| Fe(1)–O(3)   | 1.9222(16)             | 1.88(1)      |
| Fe(1)–N(1)   | 2.0684(18)             | 2.04(1)      |
| Fe(1)–N(2)   | 2.0724(18)             | 2.04(1)      |

### Pre-edge fit parameters for Complexes' [1] and [2]

The pre-edge area peaks were carried out with an error function and a pseudo-voight function in the Athena<sup>12</sup> software using the peak-fitting function. The formulas for the error(erf) and pseudo-voight function employed for the pre-edge fits are shown in equations S2 and S3.

$$\text{Error function: } A \left[ \text{erf} \left( \frac{e - E_0}{w} \right) + 1 \right] \quad (\text{Eq.S2})$$

The pseudo-voight profile is given by

$$V(x; \sigma, \gamma) \equiv \int_{-\infty}^{\infty} G(x'; \sigma) L(x - x'; \gamma) dx'; \quad (\text{Eq.S3})$$

Where  $x$  is the shift from the line centre,

$$G(x; \sigma) \text{ is the centred Gaussian profile where } G(x; \sigma) \equiv \frac{e^{-x^2/2\sigma^2}}{\sigma\sqrt{2\pi}}, \quad (\text{Eq.S4})$$

$$\text{and } L(x; \gamma) \text{ is the centred Gaussian profile, } L(x; \gamma) \equiv \frac{\gamma}{\pi(x^2 + \gamma^2)}, \quad (\text{Eq.S5})$$

The parameters  $A$ ,  $E_0$ ,  $w$ ,  $\sigma$  and  $\gamma$  for complexes **[1]** and **[2]** are tabulated below.

**Table S5:** Summary of parameters employed for the pre-edge fits of complexes **[1]** and **[2]**

| <b>Pseudo-Voight Function</b> | $E_0$<br>(Centroid, eV) | $\sigma$       | $\gamma$           | <b>AREA (units)</b> |
|-------------------------------|-------------------------|----------------|--------------------|---------------------|
| Complex <b>[1]</b>            | 7113.97                 | 2.038          | 0.385              | 19.3                |
| Complex <b>[2]</b>            | 7113.71                 | 2.119          | 0.385              | 16.1                |
| <b>Erf function</b>           | $E_0$<br>(Centroid, eV) | $w$<br>(Width) | $A$<br>(Amplitude) |                     |
| Complex <b>[1]</b>            | 7139.00                 | 16.286         | 0.592              |                     |



|             |         |        |       |
|-------------|---------|--------|-------|
| Complex [2] | 7139.00 | 14.720 | 1.113 |
|-------------|---------|--------|-------|

The pre-edge area peaks fitting were further re-carried out in the Fityk<sup>15</sup> software and as previously demonstrated<sup>16</sup>, and the same pre-edge peak areas of 19.3 and 16.1 units were obtained for Complexes' [1] and [2] respectively thus confirming the fit procedure employed in the Athena<sup>12</sup> software.

**Complex's [1] DFT Calculations.** The DFT optimization calculations were performed using the ORCA (Version 4.2.0) program package developed by Neese<sup>17</sup> and co-workers. The calculations were carried out using a variety of functionals and basis sets. Calculation (1) was carried out using the B3LYP<sup>18, 19</sup> exchange-correlation functional in combination with the triple zeta valence polarization function (def2-TZVP)<sup>20</sup>, and the atom-pairwise dispersion correction with the Becke-Johnson damping scheme (D3BJ)<sup>21, 22</sup>. Calculation (2) was furthermore optimized at the BP-86 level<sup>23, 24</sup> with the def2-TZVP<sup>20</sup> basis set, and the atom-pairwise dispersion correction D3BJ<sup>21, 22</sup>. Calculation (3) was repeated at the BLYP<sup>25</sup> level using the same basis and dispersion correction as calculations (1) and (2).

Calculation (4) was carried out using the Perdew-Burke-Erzerhoff GGA function<sup>24</sup> with the SVP polarized valence double-zeta basis set, and same dispersion corrections as calculations (1)-(3). Calculation (5) was carried out using the BP86<sup>23, 24</sup> exchange-correlation functional using the 6-31+G\* basis set<sup>26-30</sup> as previously reported<sup>16</sup> and the atom-pairwise dispersion correction D3BJ<sup>21, 22</sup>. Calculation (6) was finally carried out at the B3LYP<sup>18, 19</sup> functional using the same basis set and dispersion correction as calculation (5).

The conductor-like polarizable continuum model (CPCM)<sup>31</sup> was applied in all calculation(1)-(6) to model the acetonitrile solvent. The RI<sup>32</sup> approximations were on the one hand used to accelerate Coulomb and exchange integrals for calculations (2), (4) and (5). On the other hand, the RIJCOSX<sup>32</sup> approximations were used to accelerate Coulomb and exchange integrals for calculations (1) and (6). The default GRID settings were further used for the self-consistent field iterations and for the final energy evaluation. The calculated structures were confirmed to be minima based on a check of the energies and the absence of imaginary frequencies from frequency calculations carried out on the optimized geometries.

**Table S6:** DFT calculations using various approaches and basis sets for Complex [1]

|                  | XRD    | B3LYP-<br>def2-<br>TZVP,<br>D3BJ<br>(1) | BP86<br>def2-<br>TZVP,<br>D3BJ<br>(2) | BLYP-<br>def2-<br>TZVP,<br>D3BJ<br>(3) | PBE-<br>SVP<br>D3BJ<br>(4) | BP86<br>6-31+G*<br>D3BJ<br>(5) | B3LYP<br>6-31+G*<br>D3BJ<br>(6) |
|------------------|--------|-----------------------------------------|---------------------------------------|----------------------------------------|----------------------------|--------------------------------|---------------------------------|
| Fe-O(1)          | 1.909  | 1.992                                   | 1.993                                 | 2.012                                  | 1.987                      | 1.997                          | 1.980                           |
| Fe-O(2)          | 1.922  | 1.908                                   | 1.902                                 | 1.918                                  | 1.898                      | 1.903                          | 1.895                           |
| Fe-O(3)          | 1.927  | 1.893                                   | 1.890                                 | 1.905                                  | 1.902                      | 1.894                          | 1.904                           |
| Fe-N(1)          | 2.072  | 1.916                                   | 1.908                                 | 1.926                                  | 1.923                      | 1.910                          | 1.919                           |
| Fe-N(2)          | 2.068  | 1.918                                   | 1.912                                 | 1.931                                  | 1.920                      | 1.912                          | 1.924                           |
| O(1)-Fe-<br>O(3) | 108.24 | 104.41                                  | 101.68                                | 101.90                                 | 103.87                     | 101.95                         | 102.25                          |
| O(1)-Fe-<br>O(2) | 108.77 | 105.29                                  | 104.68                                | 104.56                                 | 103.42                     | 104.11                         | 103.10                          |
| O(1)-Fe-<br>N(2) | 109.61 | 104.43                                  | 103.78                                | 104.08                                 | 103.20                     | 103.70                         | 103.06                          |
| O(1)-Fe-         | 100.52 | 101.21                                  | 103.56                                | 103.44                                 | 104.03                     | 103.74                         | 104.59                          |

|              |        |        |        |        |        |        |        |
|--------------|--------|--------|--------|--------|--------|--------|--------|
| N(1)         |        |        |        |        |        |        |        |
| O(3)-Fe-O(2) | 103.64 | 96.62  | 96.61  | 96.98  | 97.05  | 96.54  | 97.92  |
| O(3)-Fe-N(2) | 80.20  | 84.16  | 84.33  | 84.18  | 84.09  | 84.26  | 83.56  |
| O(3)-Fe-N(1) | 147.36 | 153.30 | 153.63 | 153.51 | 150.98 | 153.26 | 151.93 |
| O(2)-Fe-N(2) | 137.84 | 149.05 | 150.69 | 150.43 | 152.24 | 151.36 | 152.84 |
| N(1)-Fe-N(2) | 75.80  | 82.33  | 82.40  | 82.28  | 81.92  | 82.61  | 82.53  |

### Synthesis.

**Complex 1.** The H<sub>4</sub>L (0.11 g, 0.4 mmol) was taken in a reaction bath inside the glovebox, and 2 mL of methanol was added to it. To the stirring ligand solution, 0.65 g of Me<sub>4</sub>NOH (25 % solution in methanol; 1.8 mmol, 4.5 equiv.) was added and allowed to stir for 2 minutes. A methanolic solution (3 mL) of Fe(ClO<sub>4</sub>)<sub>3</sub> • H<sub>2</sub>O (0.14 g, 0.4 mmol) was slowly added to the stirring reaction solution and allowed to stir at room temperature for 1 h. Precipitation of tetramethylammonium perchlorate was observed while stirring. The reaction solution was filtered and the methanolic solution was dried under reduced pressure to dryness. Acetonitrile (3 mL) was added to the reaction mixture to dissolve the residue. Excess diethyl ether was added to the reaction mixture and stir the reaction mixture for a while. The mixture was kept at –20 °C inside the refrigerator for overnight. Precipitation of a yellowish-brown solid takes place. The solid compound was separated and dried under vacuum. Single crystals suitable for X-ray diffraction quality was obtained upon diffusing diethyl ether into an acetonitrile solution of the complex at room temperature. Yield: 39 % (0.08 g). Anal. Calcd for 1•H<sub>2</sub>O (C<sub>22</sub>H<sub>41</sub>FeN<sub>4</sub>O<sub>5</sub>• H<sub>2</sub>O, 515.45 g/mol): C, 51.26; H, 8.41; N, 10.87. Found: C, 51.28; H, 8.77; N, 10.74. IR (KBr, cm<sup>-1</sup>): 3415 (br), 3017 (m), 2967 (m), 2927 (m), 1658 (m), 1592 (m), 1542 (vs), 1487 (vs), 1451 (m), 1362 (s), 1398 (s), 1242 (m), 1165 (m), 976 (m), 950 (vs), 770 (m), 652 (m), 602 (m), 560 (m). ESI-MS (negative ion mode, acetonitrile): *m/z* = 332.32 ([LFe]<sup>-</sup>).

### Product Analysis.

**Reaction of 2 with 2,6-di-*tert*-butyl-4-methoxyphenol.** A 3 mL of a 0.5 mM solution of complex 1 was taken in a 10 mL reaction bath fitted with a septum and stir bar under nitrogen environment. The reaction bath was cooled at –25 °C in an acetone-liq. N<sub>2</sub> bath. To the stirring reaction solution one equiv. of TBAH was added and stirred for 10 minutes. After the complete formation of the intermediate 2, one equiv. of 2,6-di-*tert*-butyl-4-methoxyphenol was introduced to the reaction solution through a gas-tight syringe under nitrogen atmosphere and the reaction solution was stirred for 30 minutes at –25 °C. Once the reaction is completed, the reaction solution was warmed to room temperature, passed through a short silica gel column, and analysed through GC-mass.

**Reaction of 2 with Gomberg's Dimer.** In a cuvette, 500 μL of a 0.5 mM solution of complex 1 in dry acetonitrile was introduced inside the glovebox and sealed with a septum. The cuvette was placed at –40 °C in the UNISOKU cryostat outside the glovebox. One equiv. of TBAH

(30  $\mu\text{L}$  of a 8.33 mM solution) was introduced inside the cuvette and stirred at  $-40\text{ }^\circ\text{C}$  for 10 minutes. Then, 10  $\mu\text{L}$  of  $\text{H}_2\text{O}^{18}$  was carefully introduced into the reaction solution and allowed to stir at  $-40\text{ }^\circ\text{C}$  for 1 h. Gomberg's dimer (5 equiv.) was then introduced into the reaction solution and allowed to stir for 2h at  $-40\text{ }^\circ\text{C}$ . Then, the cuvette was warmed to room temperature, and the reaction solution was passed through a short silica gel column to separate iron. The reaction solution was then analysed by GC-mass and ESI-mass spectrometry.

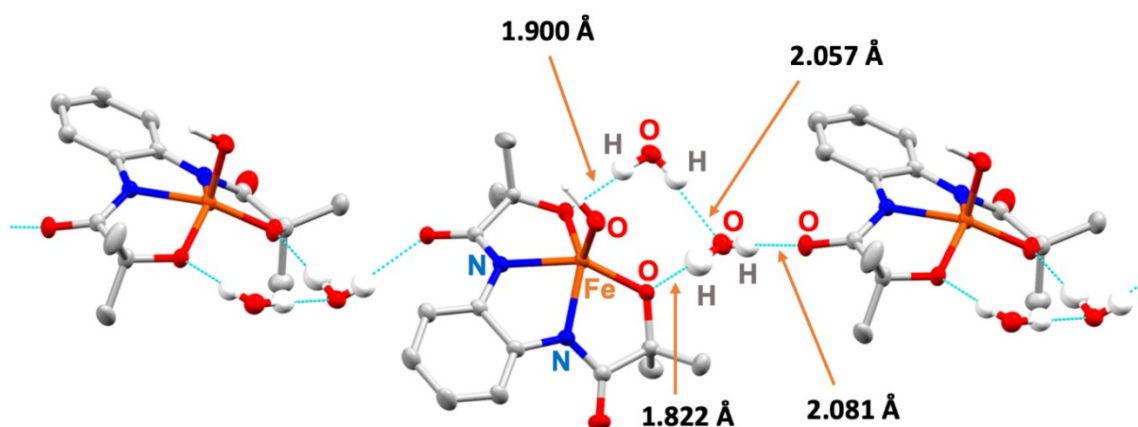

**Figure S1.** Hydrogen bonding interactions observed in the solid-state structure of complex **1**. All of the hydrogen atoms except those attached with hydroxide ion and water molecules have been omitted for clarity.

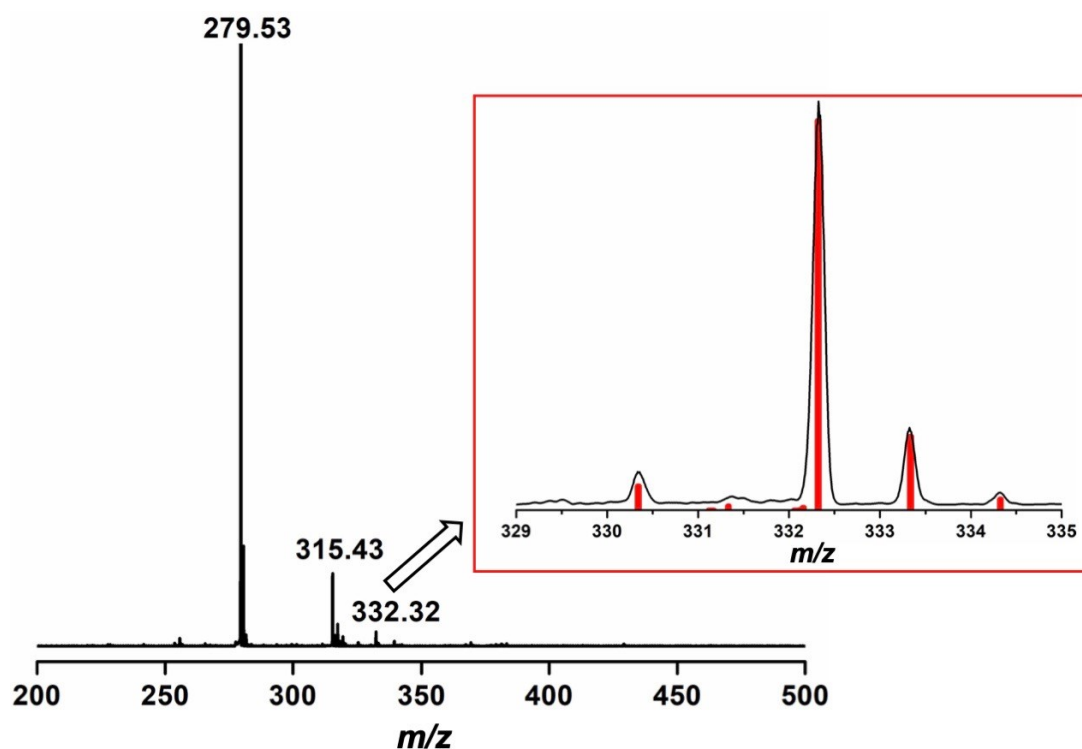

**Figure S2.** ESI mass spectrum of complex **1** in acetonitrile. Peak Assignments,  $m/z = 279.53$ , ( $[\text{H}_3\text{L}]^-$ ),  $m/z = 315.43$ , ( $[\text{L} + \text{Fe} - \text{OH}]^-$ ),  $m/z = 332.32$  ( $[(\text{L})\text{Fe}]^-$ ).

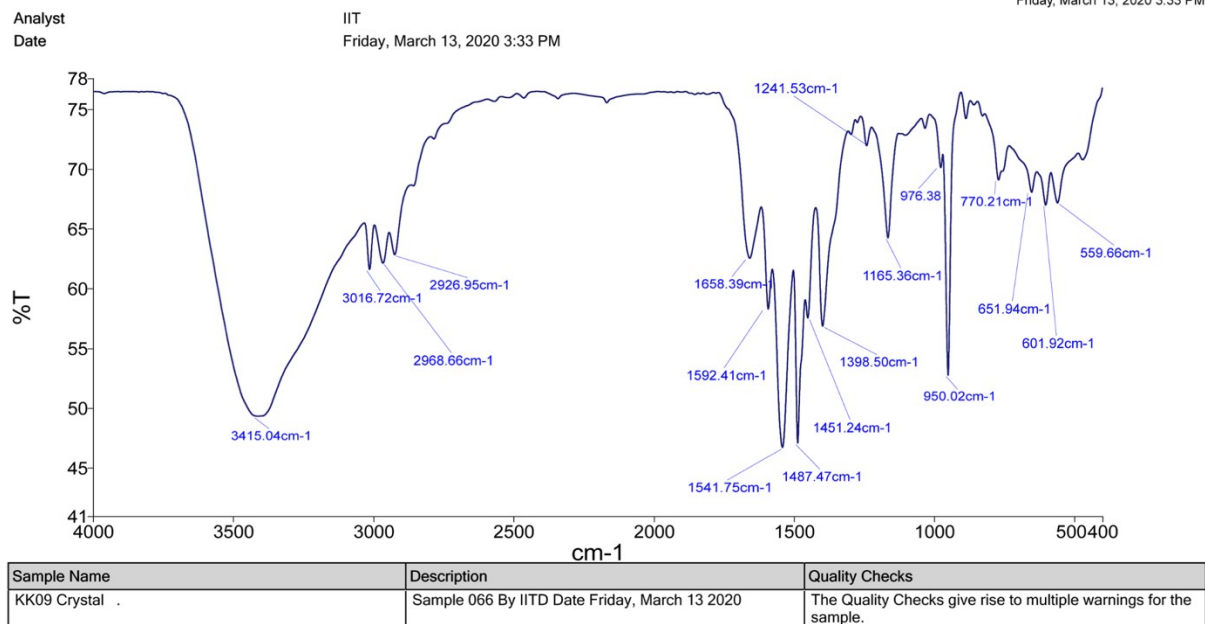

**Figure S3.** IR spectrum of complex **1**. The strong signal at  $3415\text{ cm}^{-1}$  is because of the presence of water molecules present in the crystal packing, which masks the O–H stretch coming from the OH group in the complex **1**.

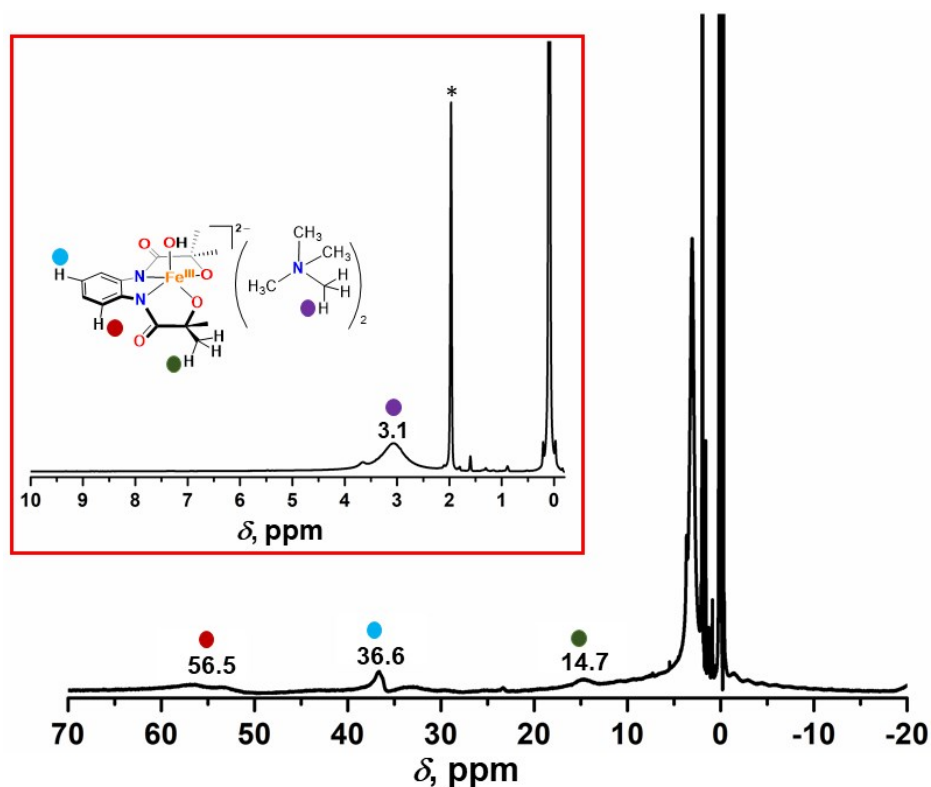

**Figure S4.**  $^1\text{H}$  NMR spectrum of complex **1** in  $\text{CD}_3\text{CN}$  at  $25\text{ }^\circ\text{C}$  in a 500 MHz NMR instrument.

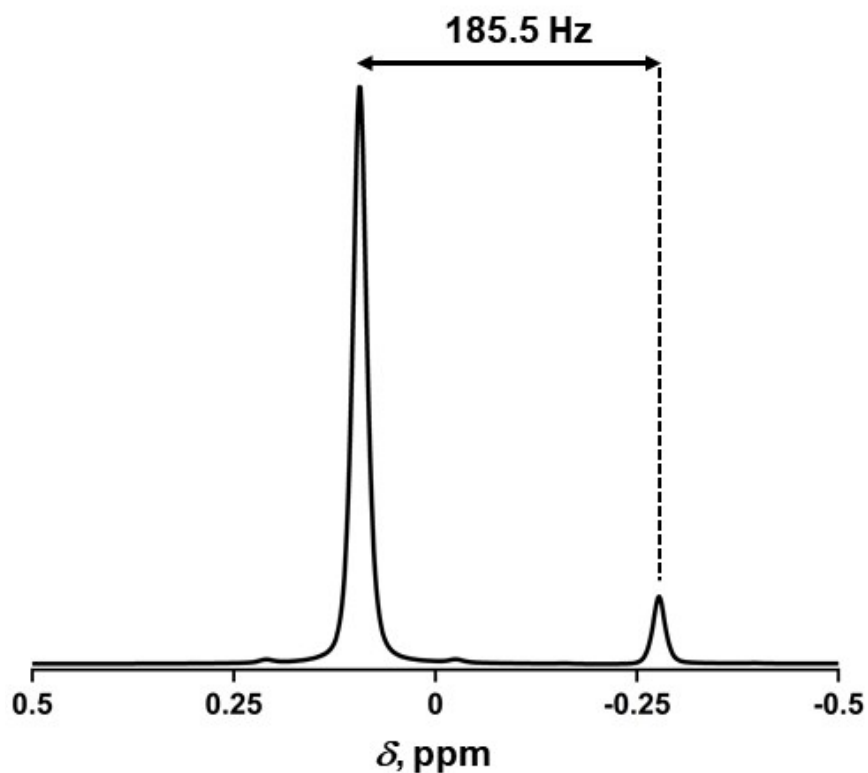

**Figure S5.** Shift of  $^1\text{H}$  NMR signal of hexamethyldisilazane in a 500 MHz NMR instrument for the estimation of magnetic moment of **1** (13 mM) in  $\text{CD}_3\text{CN}$  at 25  $^\circ\text{C}$ .

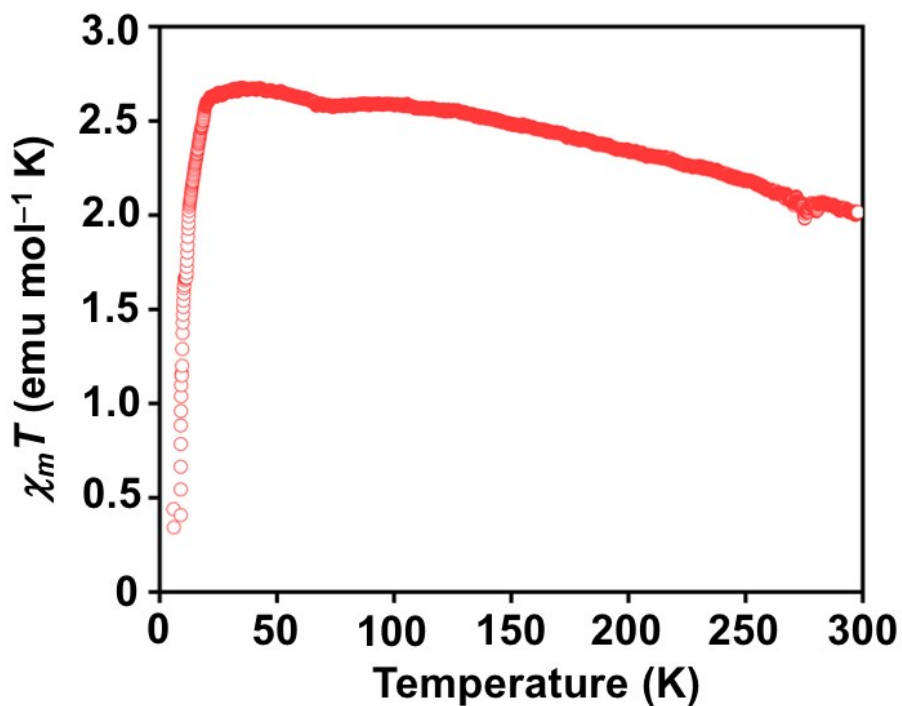

**Figure S6.** A plot of  $\chi_m T$  vs.  $T$  plot of **1** over a temperature range of 4–300 K. During the measurement, an applied magnetic field of 2 T was used.

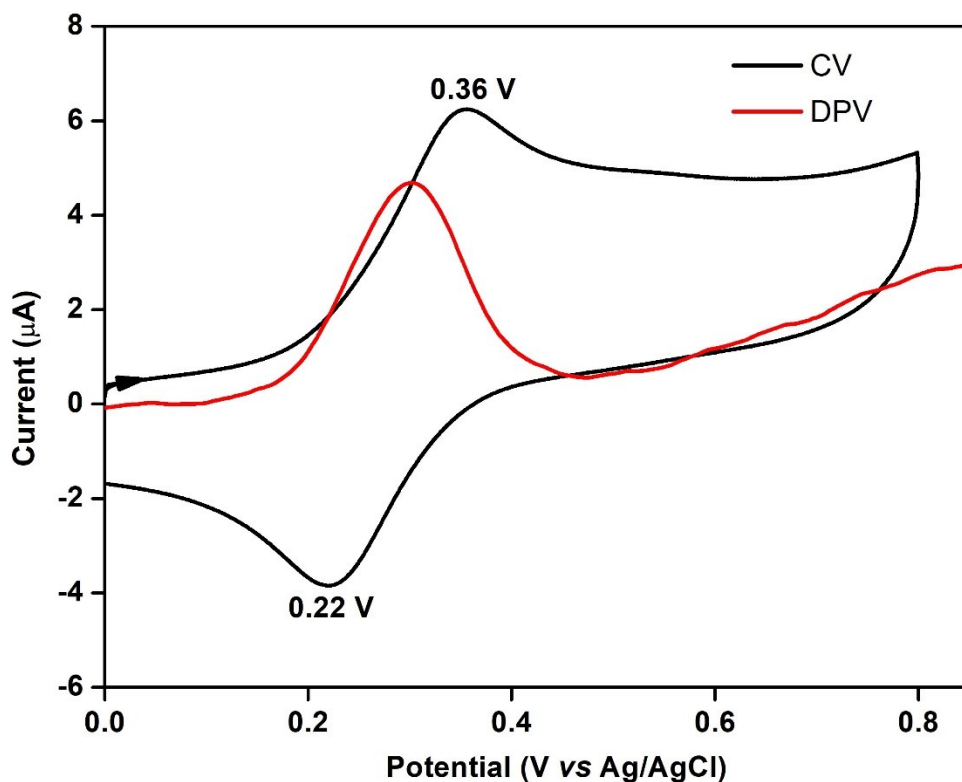

**Figure S7.** CV and DPV diagram of complex **1** (0.6 mM solution) in acetonitrile containing 0.06 M tetrabutylammonium hexafluorophosphate as counter electrolyte at 25 °C. A 3 mm glassy carbon working electrode, Pt wire counter electrode, and Ag/AgCl in saturated KCl was used as reference electrode during measurement. While CV measurement, 100 mV/s scan rate was used. The  $E_{1/2}$  value is  $-0.137$  V vs Fc/Fc<sup>+</sup> reference electrode.

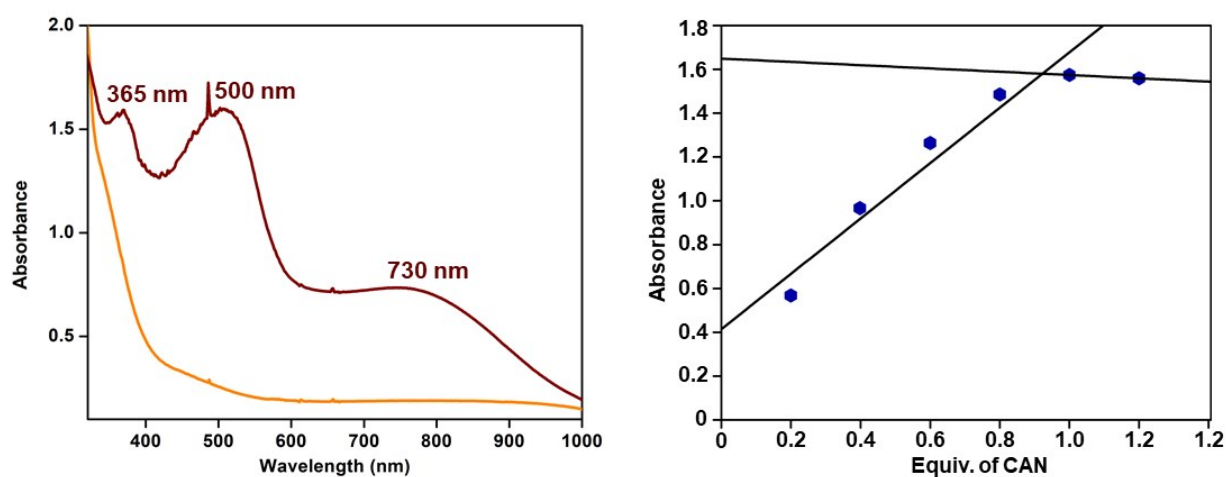

**Figure S8.** UV-Vis spectra of complex **1** (0.32 mM) and intermediate formed upon addition of 1 equiv. of ceric ammonium nitrate (CAN) to the solution of **1** in acetonitrile at  $-25$  °C.

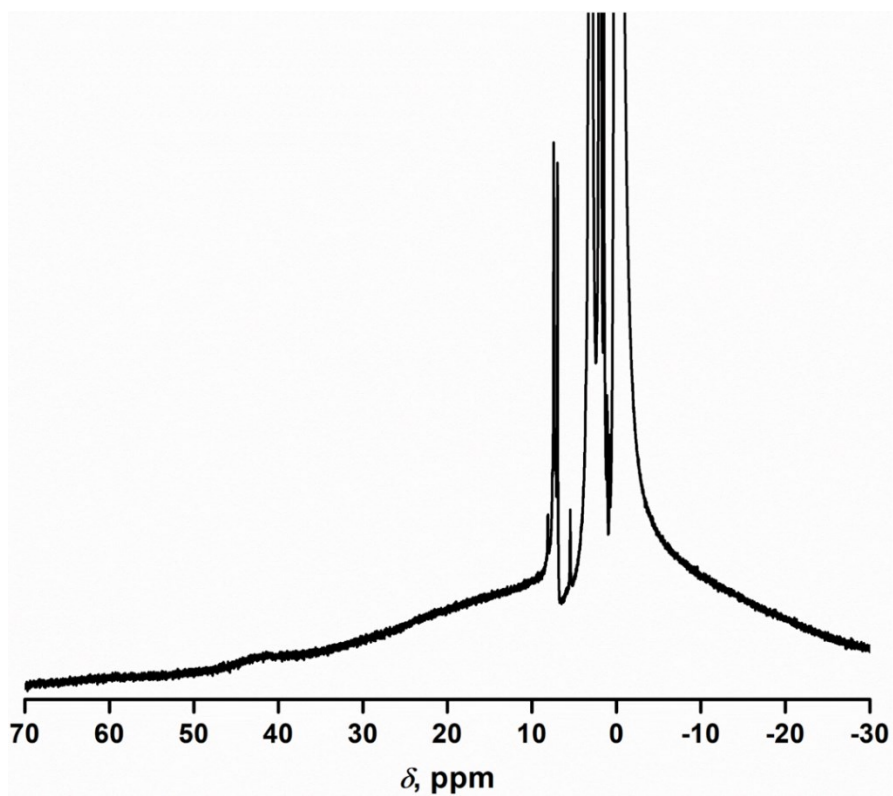

**Figure S9.**  $^1\text{H}$  NMR spectrum of complex **2** in  $\text{CD}_3\text{CN}$  in a 500 MHz NMR instrument at  $-30^\circ\text{C}$ .

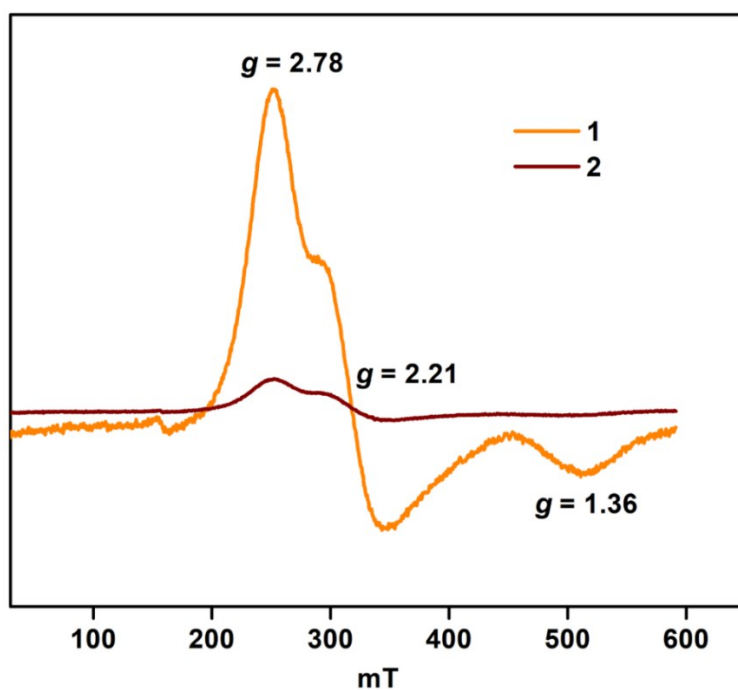

**Figure S10.** EPR spectrum of complex **1** and **2** in acetonitrile at 100 K. Quantification of EPR signal indicates that there is *ca.* 15% unreacted complex **1** in the reaction solution obtained upon addition of TBAH to **1** in acetonitrile.

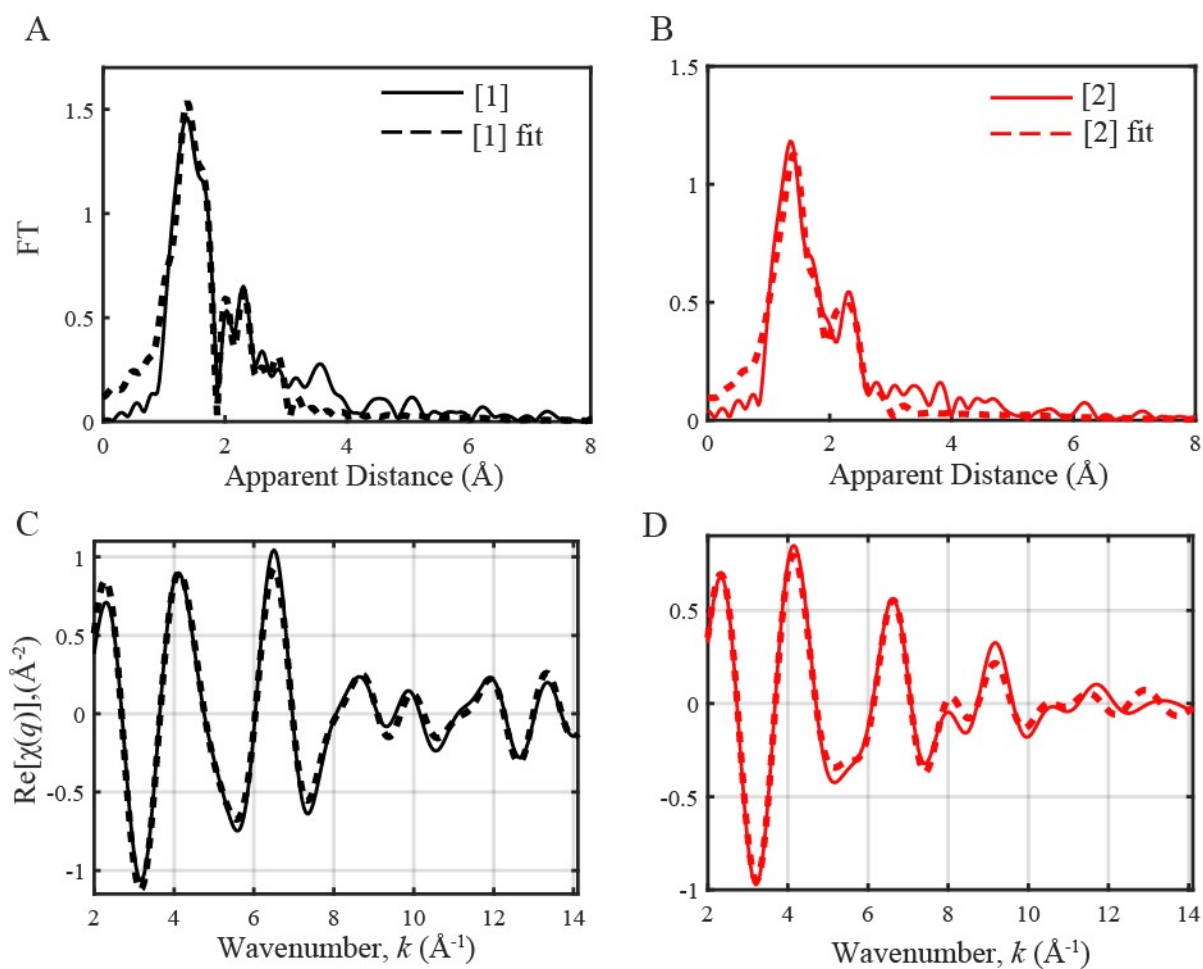

**Figure S11.** Fourier transforms of  $k^2$ -weighted Fe EXAFS for **A.** 5 mM Fe(III) complex **1** (solid black line) and its corresponding fit (Fit 3, Table S3), for **B.** the ligand oxidized product, complex **2**, generated with 1 equiv. of TBAH, (solid red line), and its corresponding fit (Fit 6, Table S3). Back Fourier transformed experimental (solid lines) and fitted (dashed lines)  $\text{Re}[\chi(q)]$  for **C.** Complex **1** (solid black line) and its corresponding fit (Fit 3, Table S3), for **D.** Complex **2** (solid red line) and its corresponding fit (Fit 6, Table S3).



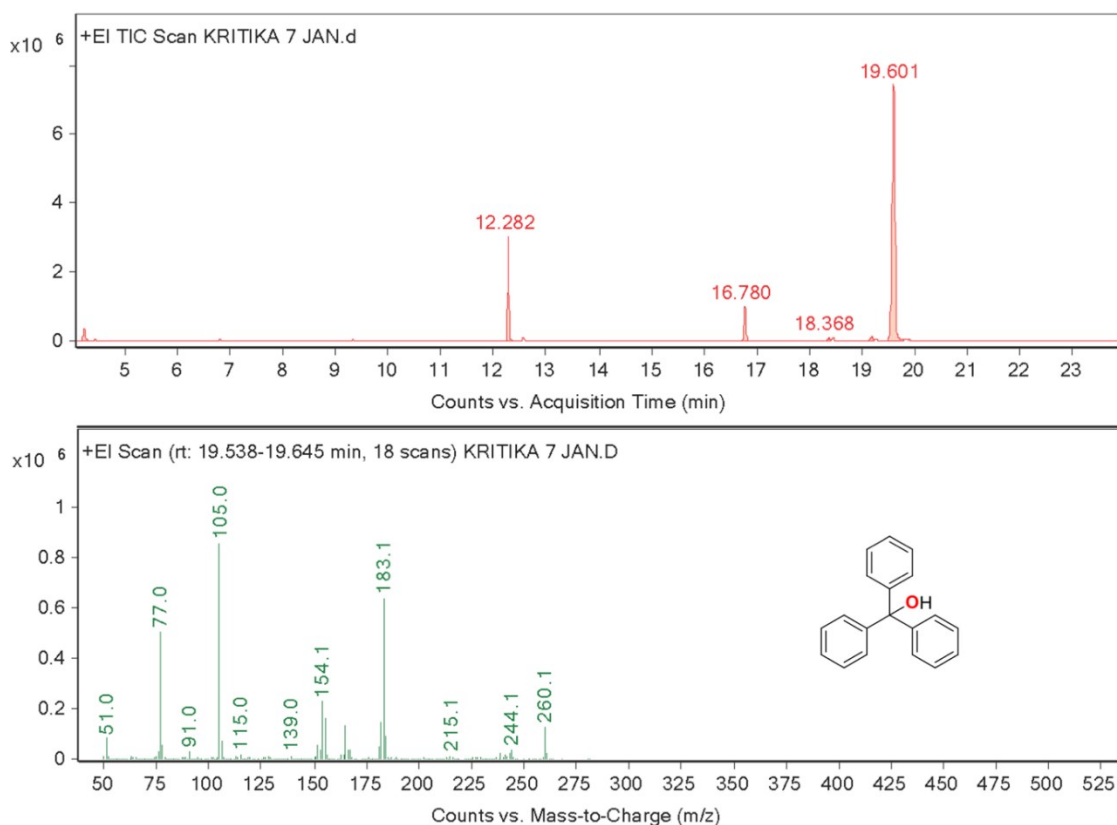

**Figure S12.** GC-mass spectrum of the reaction solution obtained upon reacting intermediate  $[(L^\bullet)\text{Fe}^{\text{III}}\text{OH}]^-$  (**2**) with Gomberg's dimer.

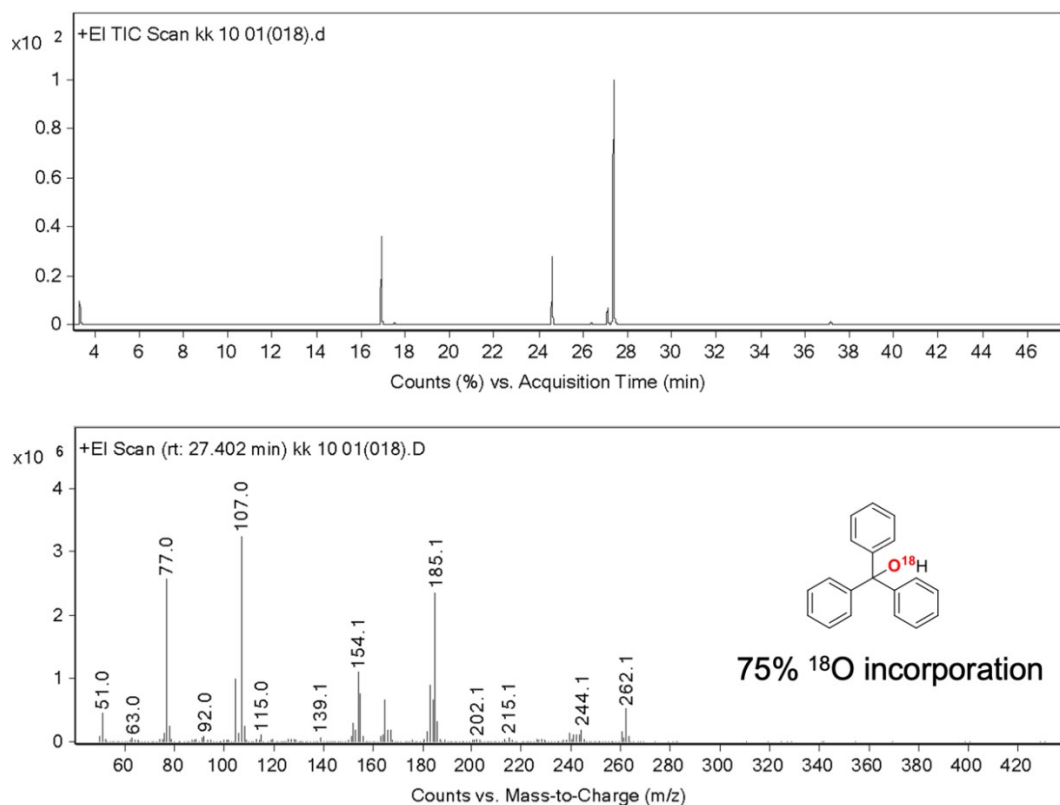

**Figure S13.** GC-mass spectrum of the reaction solution obtained upon reacting intermediate  $[(L^\bullet)\text{Fe}^{\text{III}}\text{O}^{18}\text{H}]^-$  with Gomberg's dimer.

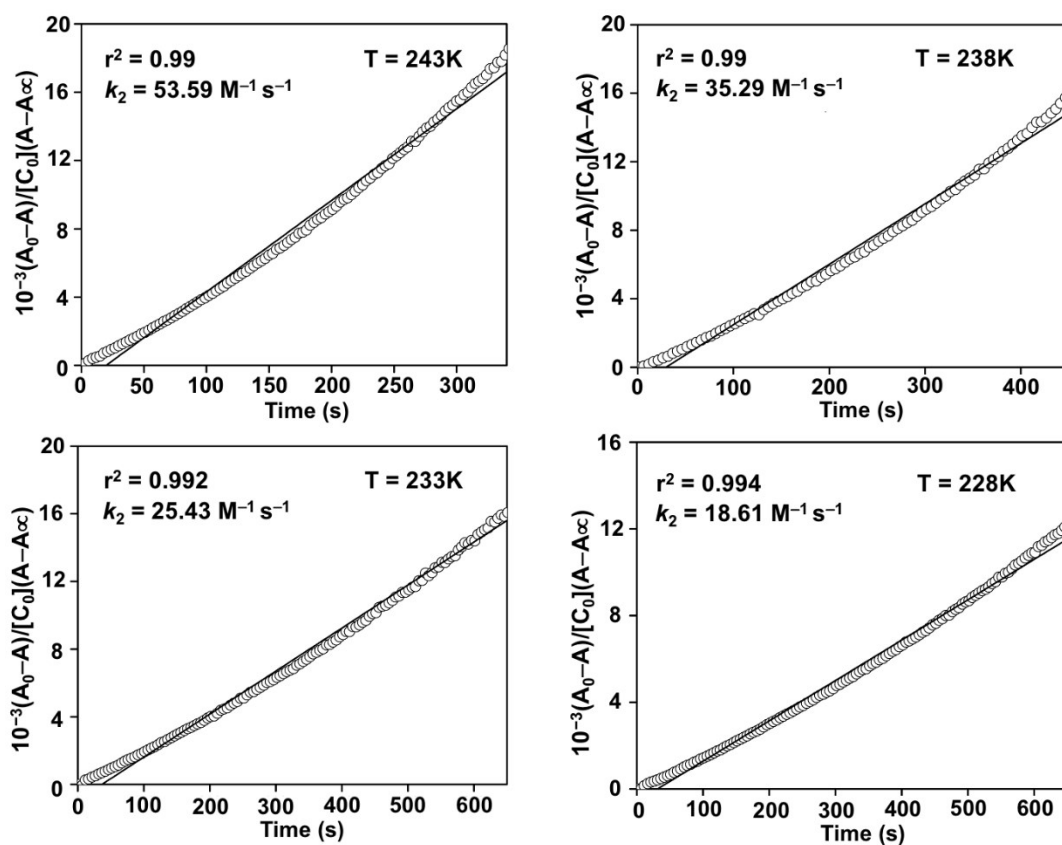

**Figure S14.** Second-order fitting of the time trace at 470 nm at different temperatures of the reaction of **2** (0.32 mM) with 2,6-Di-*tert*-butyl-4-methoxyphenol (0.32 mM) in acetonitrile at different temperatures.

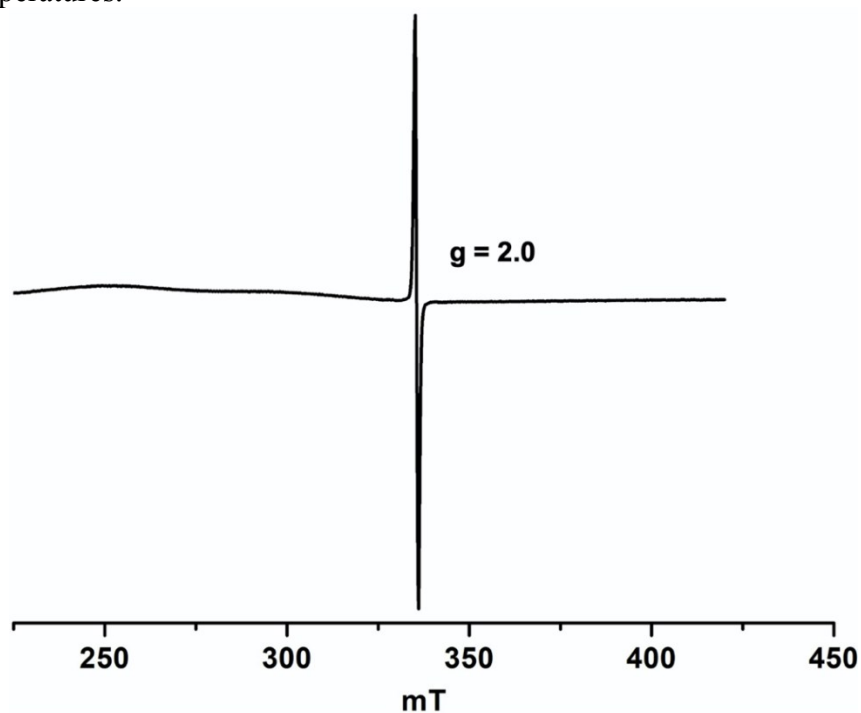

**Figure S15.** X-band EPR spectrum of the reaction mixture obtained upon addition of 0.5 mM of 2,6-Di-*tert*-butyl-4-methoxyphenol to intermediate complex **2** (0.5 mM) in acetonitrile at  $-25\text{ }^\circ\text{C}$ . The EPR data was collected at 100K.

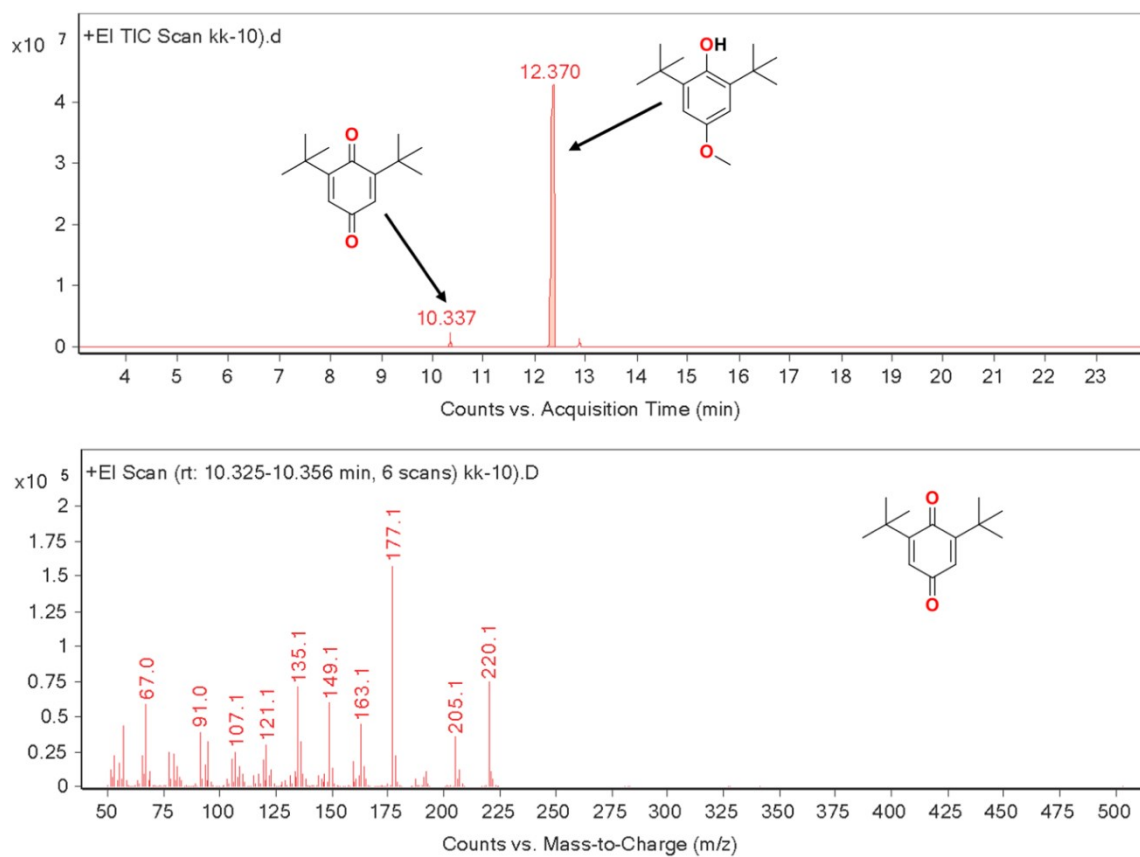

**Figure S16.** GC-mass spectrum of the reaction solution obtained upon reacting intermediate **2** with 2,6-Di-*tert*-butyl-4-methoxyphenol.

**Table S7.** Second-order-rate constants ( $k_2$ ) for the reaction of intermediate **2** with 2,6-Di-*tert*-butyl-4-methoxyphenol at different temperatures.

| Temperature (K) | $k_2$ ( $M^{-1} s^{-1}$ ) |
|-----------------|---------------------------|
| 248             | 71.15                     |
| 243             | 53.59                     |
| 238             | 35.29                     |
| 233             | 25.43                     |
| 228             | 18.61                     |

**Table S8.** Activation parameters of different HAT type reactions.

| Intermediate                                                                                                                                                                  | Substrate                                               | $\Delta H^\ddagger$ (Kcal mol <sup>-1</sup> ) | $\Delta S^\ddagger$ (cal mol <sup>-1</sup> K <sup>-1</sup> ) |
|-------------------------------------------------------------------------------------------------------------------------------------------------------------------------------|---------------------------------------------------------|-----------------------------------------------|--------------------------------------------------------------|
| $[(L\bullet)Fe^{III}(OH)]^{-a}$                                                                                                                                               | 2,6-Di- <i>tert</i> -butyl-4-methoxyphenol <sup>a</sup> | $7.23 \pm 0.28$                               | $-20.54 \pm 1.6$                                             |
| 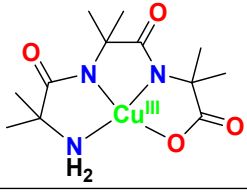                                                                                             | 2,4-Di- <i>tert</i> -butylphenol <sup>33</sup>          | $8.3 \pm 1.1$                                 | $-27 \pm 3$                                                  |
|                                                                                              | 2,6-Di- <i>tert</i> -butyl-4-methoxyphenol <sup>2</sup> | $3.6 \pm 0.6$                                 | $-32 \pm 3$                                                  |
| <br>R =  | 2,4-Di- <i>tert</i> -butylphenol <sup>34</sup>          | $6.3 \pm 1.4$                                 | $-35.6 \pm 2.3$                                              |
|                                                                                            | 2,4-6-tri- <i>tert</i> -butylphenol <sup>35</sup>       | $1.6 \pm 0.2$                                 | $-36 \pm 2$                                                  |
|                                                                                            | Phenol <sup>36</sup>                                    | $11.3 \pm 0.8$                                | $-14 \pm 2$                                                  |

<sup>a</sup>Present study.

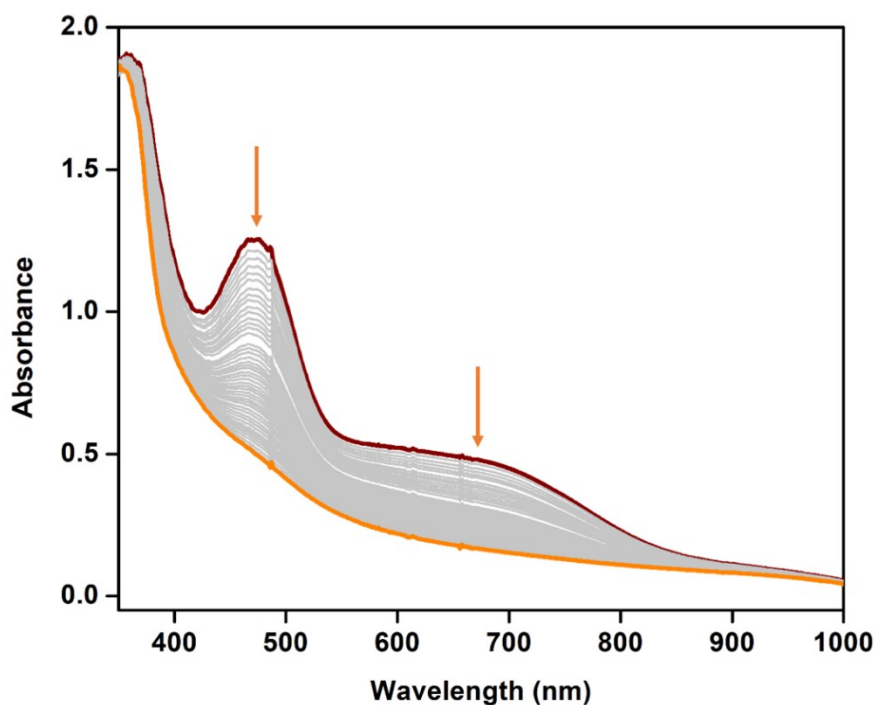

**Figure S17.** Change of single spectrum of **2** (0.32 mM) upon addition of 11.9 mM solution of 4-methyl-2,6-di-*tert*-butylphenol (4-Me-DTBP) in acetonitrile at  $-25\text{ }^{\circ}\text{C}$ .

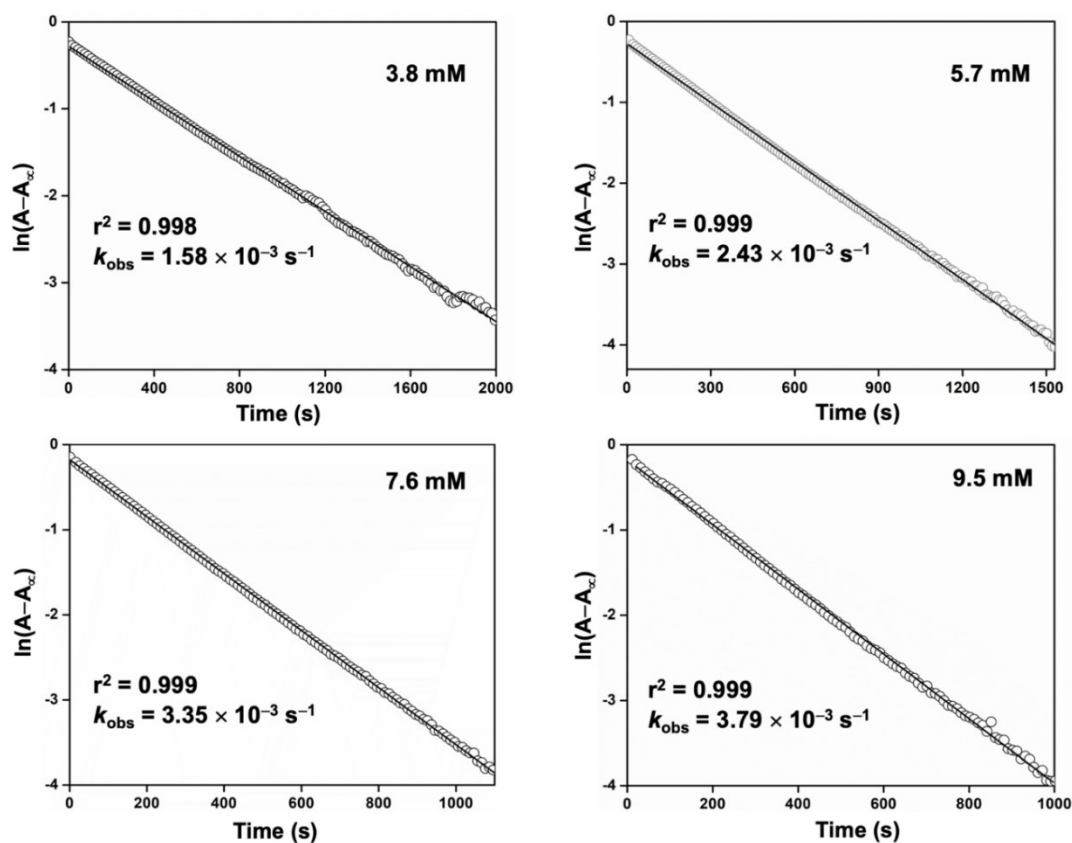

**Figure S18.** Pseudo-first-order fitting of the time trace at 470 nm for the reaction of **2** (0.32 mM) with 4-methyl-2,6-di-*tert*-butylphenol at different concentrations (3.8–9.5 mM). The reaction was studied at  $-25\text{ }^{\circ}\text{C}$ . Pseudo-first-order rate constants ( $k_{\text{obs}}$ ) were determined from the slope of the above plots.

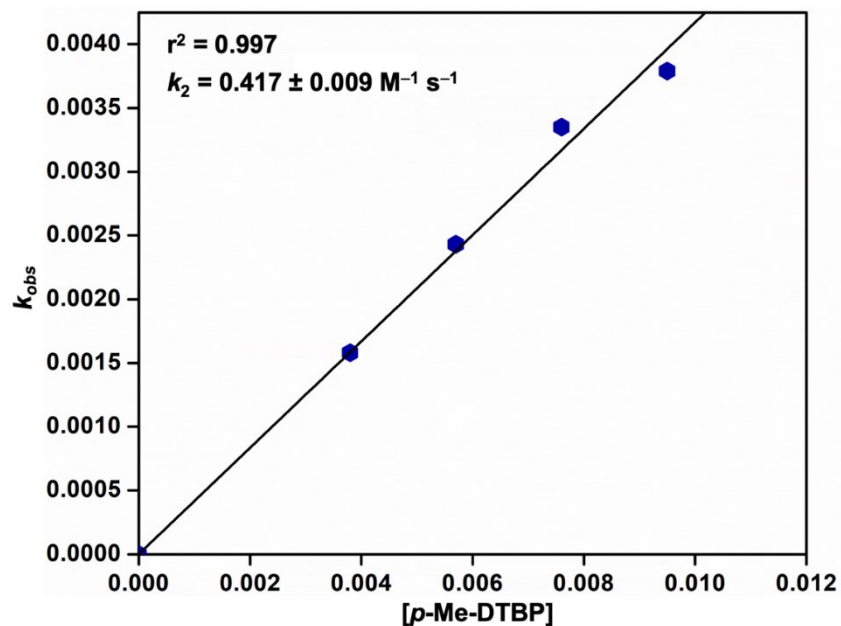

**Figure S19.** A plot of  $k_{obs}$  vs. [4-methyl-2,6-di-*tert*-butylphenol]. The  $k_{obs}$  values were obtained reacting **2** with different concentration of 4-methyl-2,6-di-*tert*-butylphenol at  $-25\text{ }^{\circ}\text{C}$  in acetonitrile. The second order-rate constant was obtained from the slope of the plot.

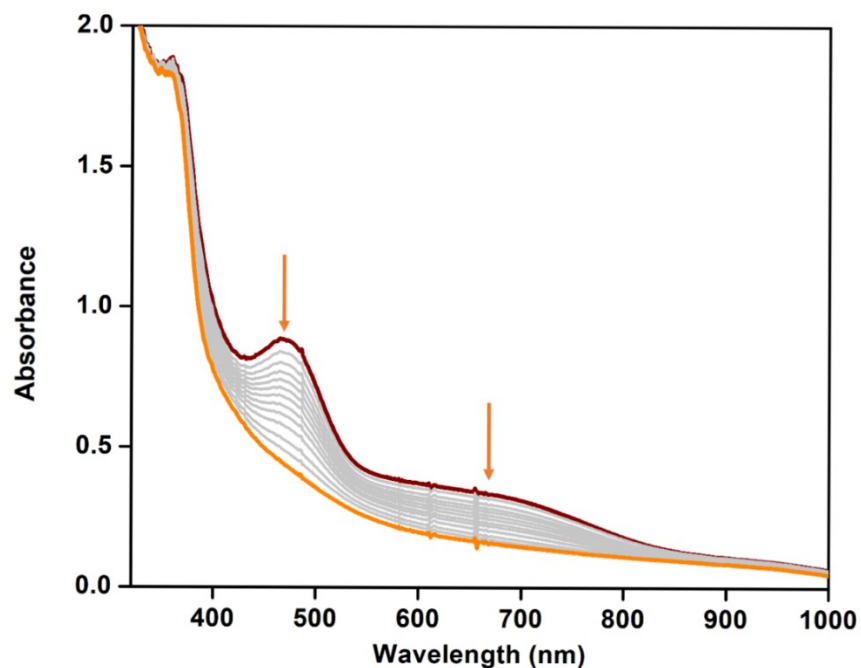

**Figure S20.** Change of single spectrum of **2** (0.25 mM) upon addition of 2.6 mM of 4-Ethyl-2,6-di-*tert*-butylphenol in acetonitrile at  $-25\text{ }^{\circ}\text{C}$ .

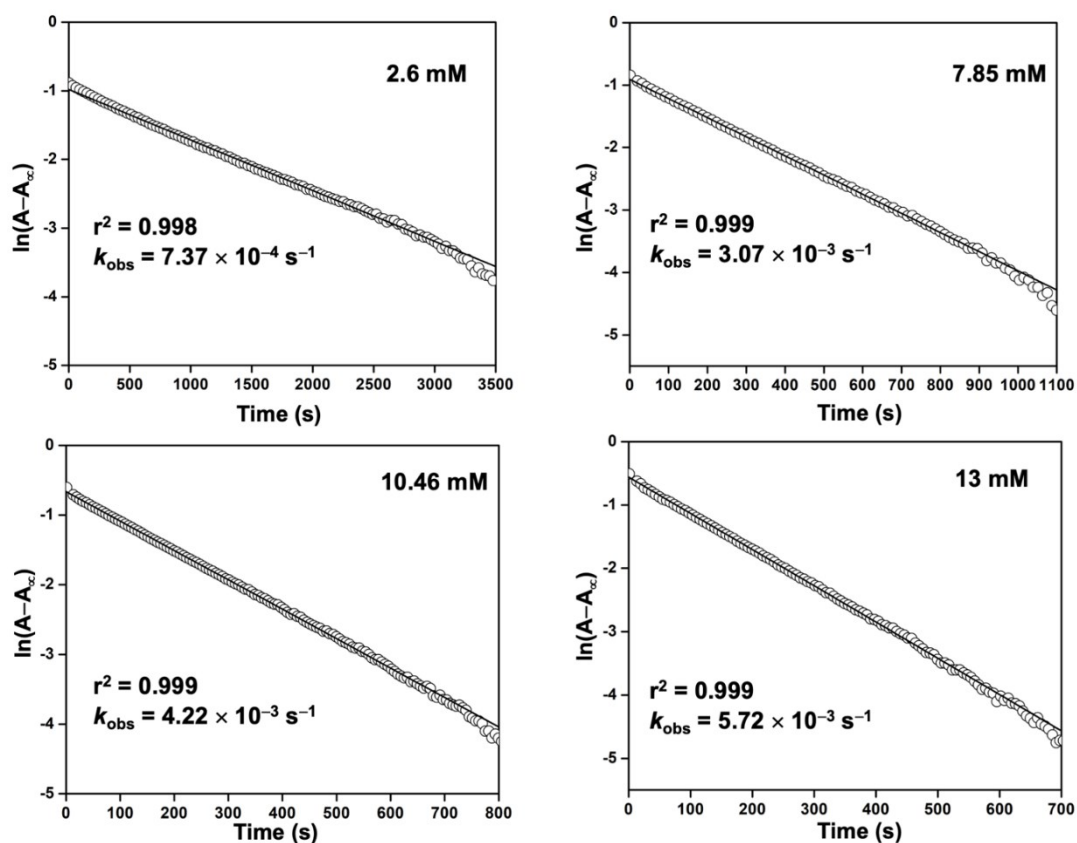

**Figure S21.** Pseudo-first-order fitting of the time trace at 470 nm for the reaction of **2** (0.25 mM) with 4-Ethyl-2,6-di-*tert*-butylphenol at different concentrations (2.6–13 mM). The reaction was studied at  $-25\text{ }^{\circ}\text{C}$ . Pseudo-first-order rate constants ( $k_{\text{obs}}$ ) were determined from the slope of the above plots.

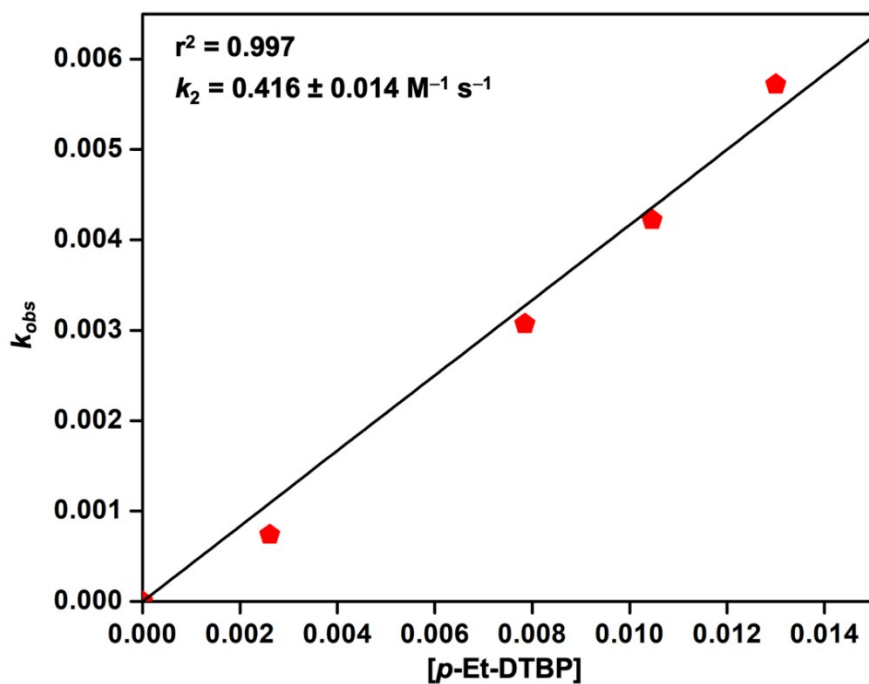

**Figure S22.** A plot of  $k_{\text{obs}}$  vs. [4-Ethyl-2,6-di-*tert*-butylphenol]. The  $k_{\text{obs}}$  values were obtained reacting **2** with different concentration of 4-Ethyl-2,6-di-*tert*-butylphenol at  $-25\text{ }^{\circ}\text{C}$  in acetonitrile. The second order-rate constant was obtained from the slope of the plot.

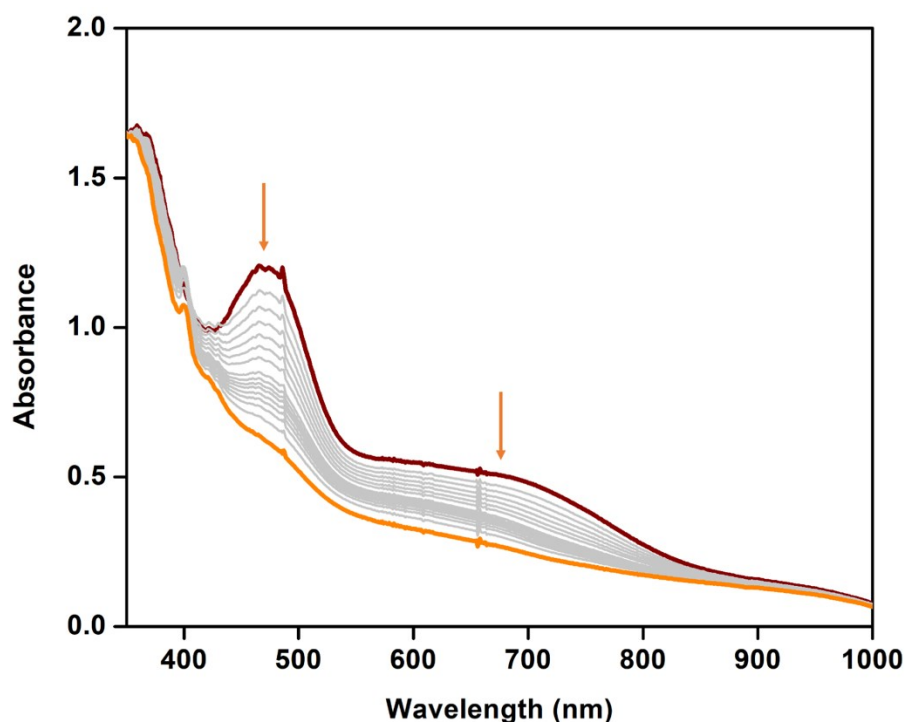

**Figure S23.** Change of single spectrum of **2** (0.32 mM) upon addition of 3.8 mM of 2,4,6-tri-*tert*-butylphenol (TTBP) in acetonitrile at  $-25\text{ }^{\circ}\text{C}$ .

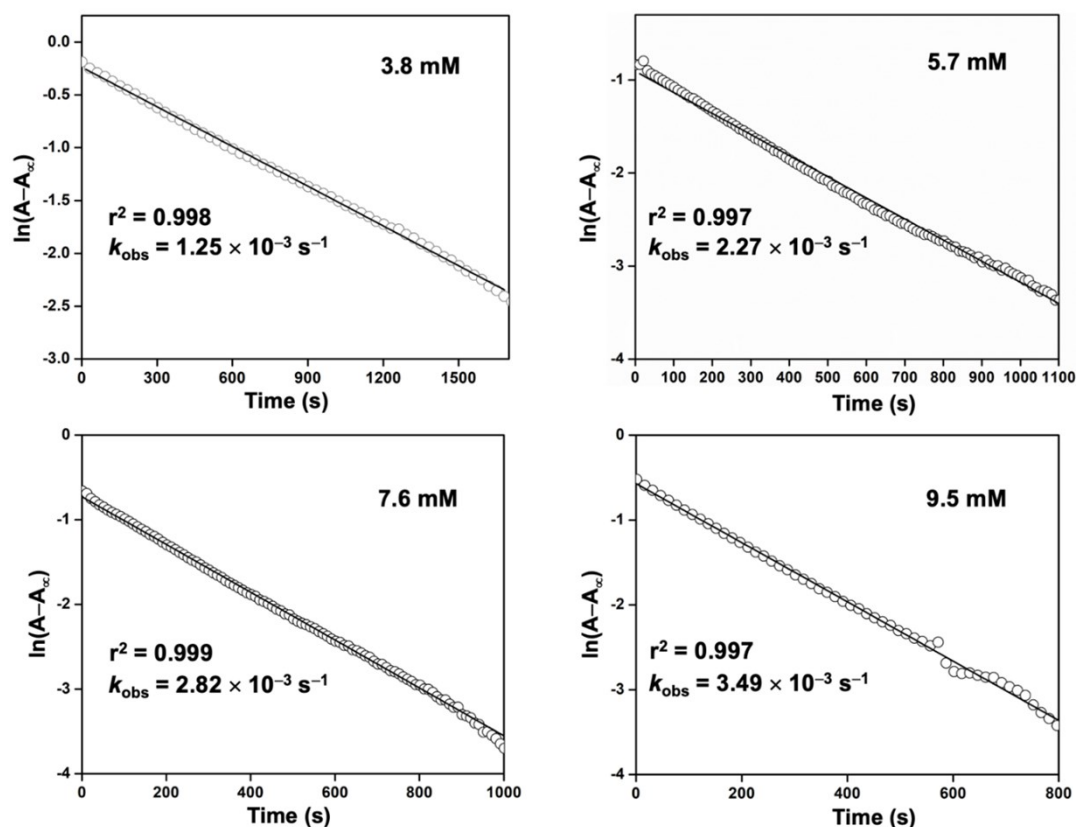

**Figure S24.** Pseudo-first-order fitting of the time trace at 470 nm for the reaction of **2** (0.32 mM) with 2,4,6-tri-*tert*-butylphenol at different concentrations (3.8–9.5 mM). The reaction was studied at  $-25\text{ }^{\circ}\text{C}$ . Pseudo-first-order rate constants ( $k_{\text{obs}}$ ) were determined from the slope of the above plots.



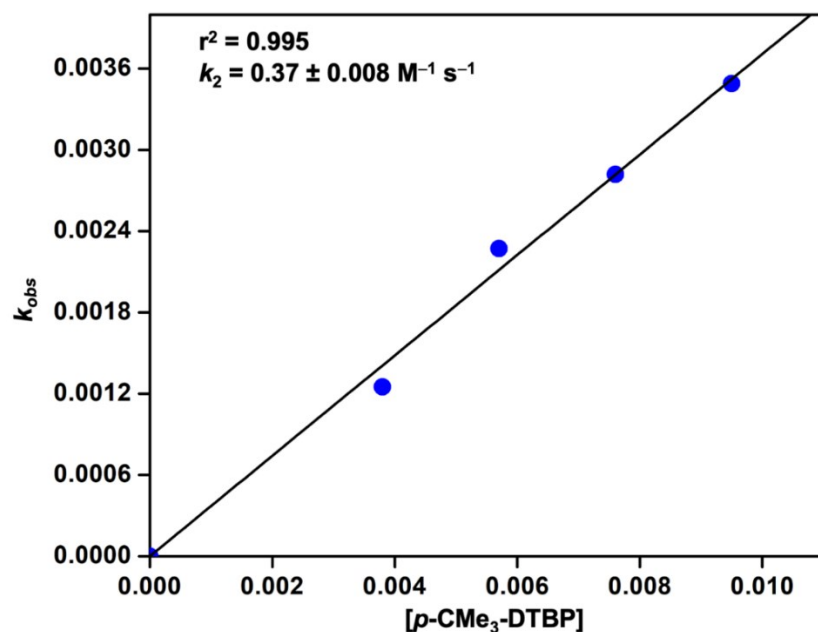

**Figure S25.** A plot of  $k_{\text{obs}}$  vs. [2,4,6-tri-*tert*-butylphenol]. The  $k_{\text{obs}}$  values were obtained reacting **2** with different concentration of 2,4,6-tri-*tert*-butylphenol at  $-25^\circ\text{C}$  in acetonitrile. The second order-rate constant was obtained from the slope of the plot.

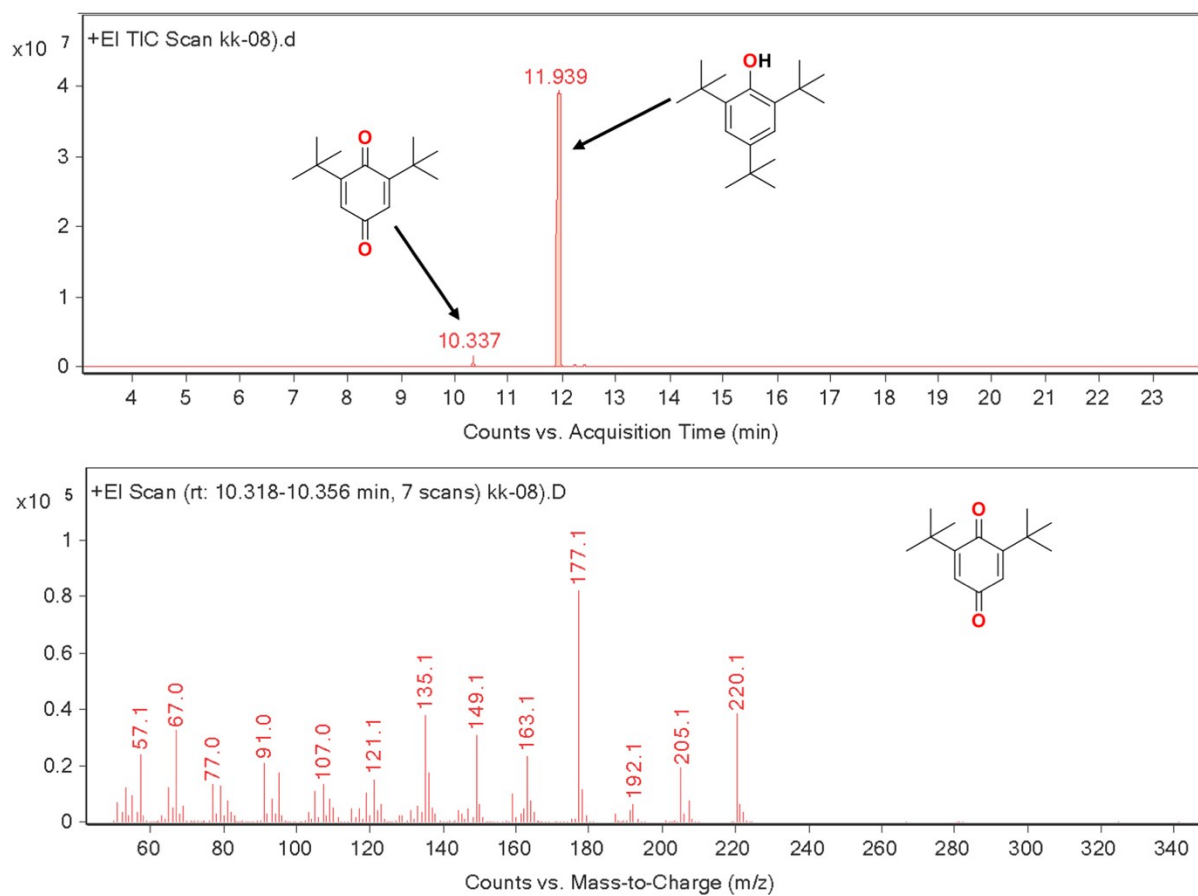

**Figure S26.** GC-mass spectrum of the reaction solution obtained upon reacting intermediate **2** with 2,4,6-tri-*tert*-butylphenol.

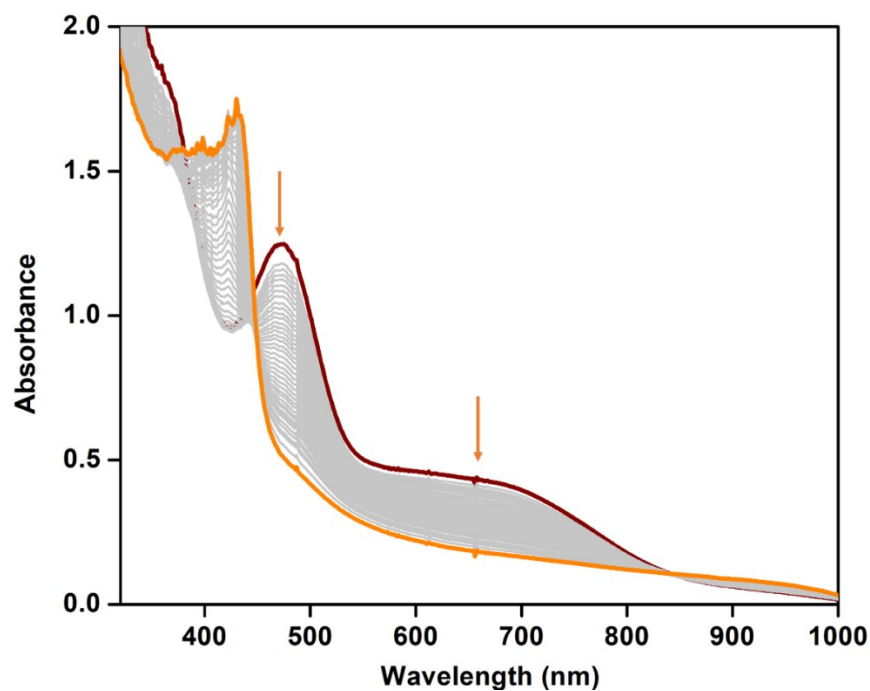

**Figure S27.** Change of single spectrum of **2** (0.32 mM) upon addition of 10.3 mM of 2,6-di-*tert*-butylphenol in acetonitrile at  $-25\text{ }^{\circ}\text{C}$ .

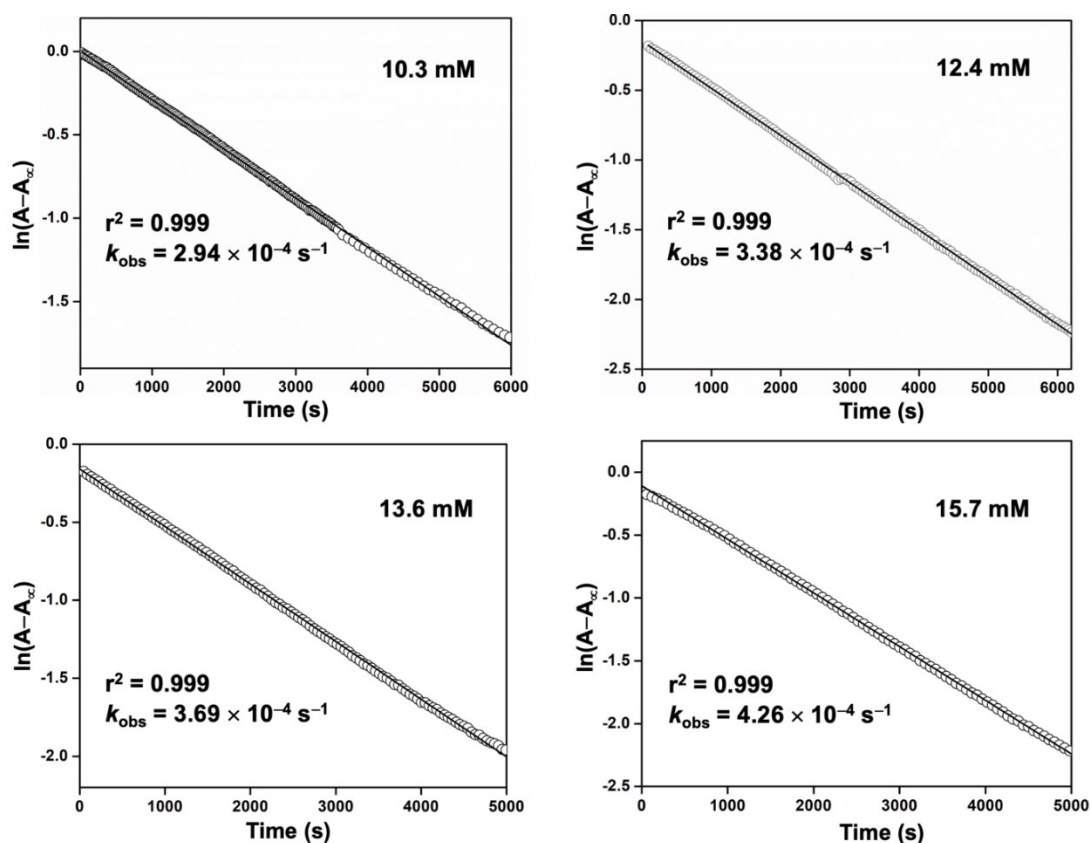

**Figure S28.** Pseudo-first-order fitting of the time trace at 470 nm for the reaction of **2** (0.32 mM) with 2,6-di-*tert*-butylphenol at different concentrations (10.3–15.7 mM). The reaction was studied at  $-25\text{ }^{\circ}\text{C}$ . Pseudo-first-order rate constants ( $k_{\text{obs}}$ ) were determined from the slope of the above plots.

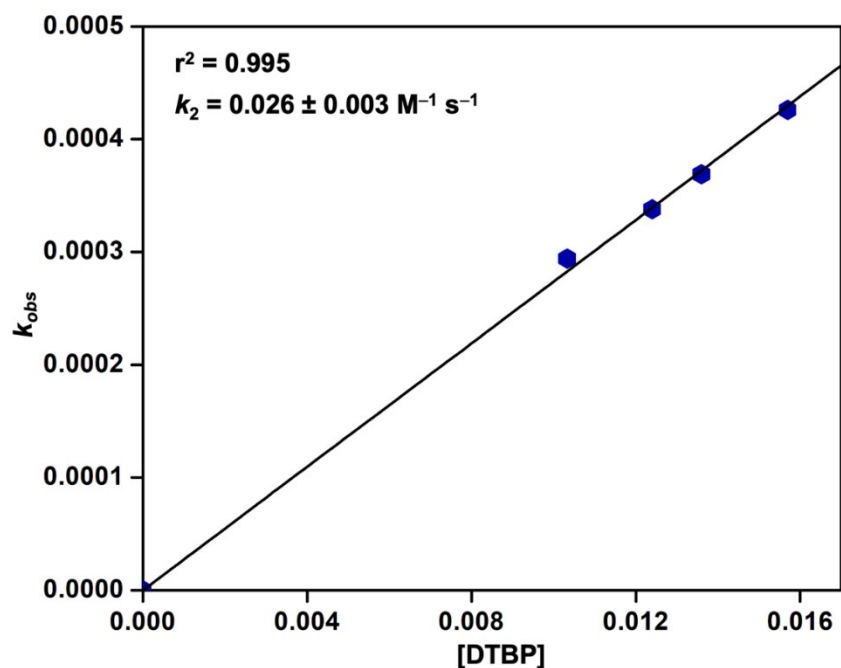

**Figure S29.** A plot of  $k_{obs}$  vs. [2, 6-di-*tert*-butylphenol]. The  $k_{obs}$  values were obtained reacting **2** with different concentration of 2, 6-di-*tert*-butylphenol at  $-25$  °C in acetonitrile. The second order-rate constant was obtained from the slope of the plot.

**Table S9.** Second order rate constant for the reaction of **2** with 4-X-2,6-di-*tert*-butylphenols (X=  $-\text{OCH}_3$ ,  $-\text{CH}_3$ ,  $-\text{C}(\text{CH}_3)_3$ ,  $-\text{H}$ ) and O–H bond dissociation energy of different phenols.<sup>37</sup>

| Substrate                                  | O–H BDE (kcal. mol <sup>-1</sup> ) <sup>a</sup> | $k_2$ (M <sup>-1</sup> s <sup>-1</sup> ) | $\log k_2$ |
|--------------------------------------------|-------------------------------------------------|------------------------------------------|------------|
| 2,6-di- <i>tert</i> -butyl-4-methoxyphenol | 78.31                                           | 71.15                                    | 1.85217    |
| 2,6-di- <i>tert</i> -butyl-4-methylphenol  | 81.02                                           | 0.417                                    | -0.37986   |
| 2,4,6-tri- <i>tert</i> -butylphenol        | 81.24                                           | 0.375                                    | -0.42597   |
| 2, 6-di- <i>tert</i> -butylphenol          | 82.8                                            | 0.026                                    | -1.58503   |

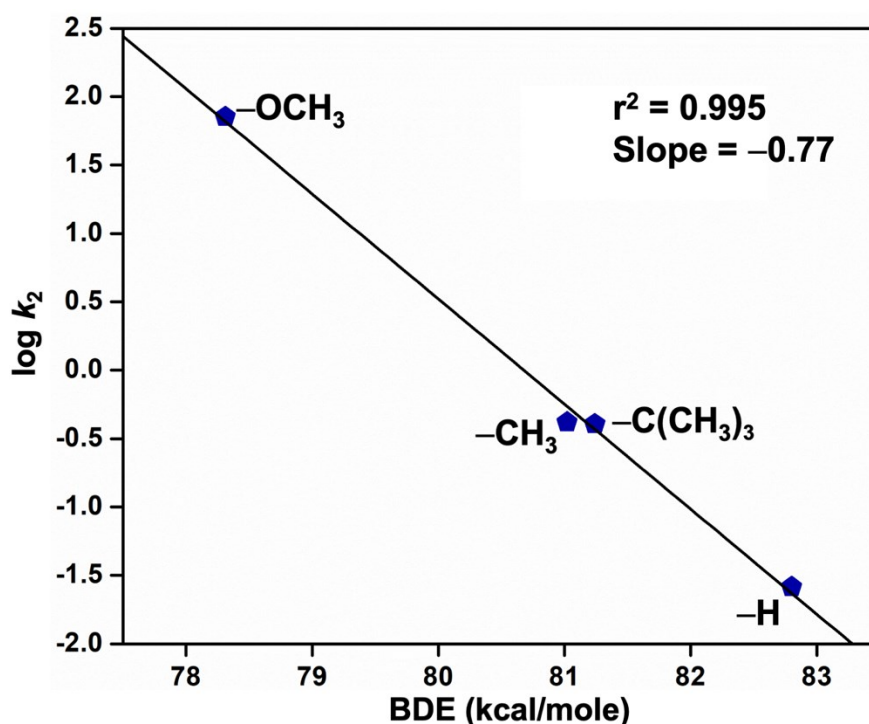

**Figure S30.** A plot of  $\log k_2$  versus bond dissociation energy of the 4-X-2,6-di-*tert*-butylphenols (X= -OCH<sub>3</sub>, -CH<sub>3</sub>, -C(CH<sub>3</sub>)<sub>3</sub>, -H).

**Table S10.** Second order rate constants for the reaction of intermediate **2** with 4-X-2,6-di-*tert*-butylphenols (X= -OCH<sub>3</sub>, -OCH<sub>3</sub>(-*d*), -CH<sub>3</sub>, -C(CH<sub>3</sub>)<sub>3</sub>, -H) and  $\sigma_p^+$  values of different *p*-substituted-2,6-di-*tert*-butylphenols.<sup>3</sup>

| Phenols                                    | $\sigma_p^+$ | $k_2$ (M <sup>-1</sup> s <sup>-1</sup> ) | $\log k_2$ |
|--------------------------------------------|--------------|------------------------------------------|------------|
| 2,6-di- <i>tert</i> -butyl-4-methoxyphenol | -0.78        | 71.15                                    | 1.85217    |
| 2,6-di- <i>tert</i> -butyl-4-methylphenol  | -0.31        | 0.417                                    | -0.37986   |
| 4-Ethyl-2,6-di- <i>tert</i> -butylphenol   | -0.29        | 0.416                                    | -0.38090   |
| 2,4,6-tri- <i>tert</i> -butylphenol        | -0.26        | 0.375                                    | -0.42597   |
| 2, 6-di- <i>tert</i> -butylphenol          | 0            | 0.026                                    | -1.58503   |

**Table S11.** Second order rate constants for the reaction of intermediate **2** with 4-X-2,6-di-*tert*-butylphenols (X= -OCH<sub>3</sub>, -OCH<sub>3</sub>(-*d*), -CH<sub>3</sub>, -CH<sub>2</sub>CH<sub>3</sub>, -C(CH<sub>3</sub>)<sub>3</sub>, -H) and oxidation potential of different *p*-substituted-2,6-di-*tert*-butylphenols.<sup>2</sup>

| Phenols                                              | $E_{Ox}/V$<br>$Fc/Fc^{+a}$ | vs. | $k_2$ (M <sup>-1</sup> s <sup>-1</sup> ) | T/K | $(RT/F)\ln k_2$ |
|------------------------------------------------------|----------------------------|-----|------------------------------------------|-----|-----------------|
| 2,6-di- <i>tert</i> -butyl-4-methoxyphenol           | 0.526                      |     | 71.15                                    | 248 | 0.0911          |
| 2,6-di- <i>tert</i> -butyl-4-methoxyphenol- <i>d</i> | 0.585                      |     | 51.14                                    | 248 | 0.08404         |
| 2,6-di- <i>tert</i> -butyl-4-methylphenol            | 0.81                       |     | 0.417                                    | 248 | -0.01868        |
| 4-Ethyl-2,6-di- <i>tert</i> -butylphenol             | 0.88                       |     | 0.416                                    | 248 | -0.01869        |
| 2,4,6-tri- <i>tert</i> -butylphenol                  | 0.927                      |     | 0.375                                    | 248 | -0.02095        |
| 2, 6-di- <i>tert</i> -butylphenol                    | 1.074                      |     | 0.026                                    | 248 | -0.07796        |

<sup>a</sup> $E_{Ox}$  values are taken from ref. [2]

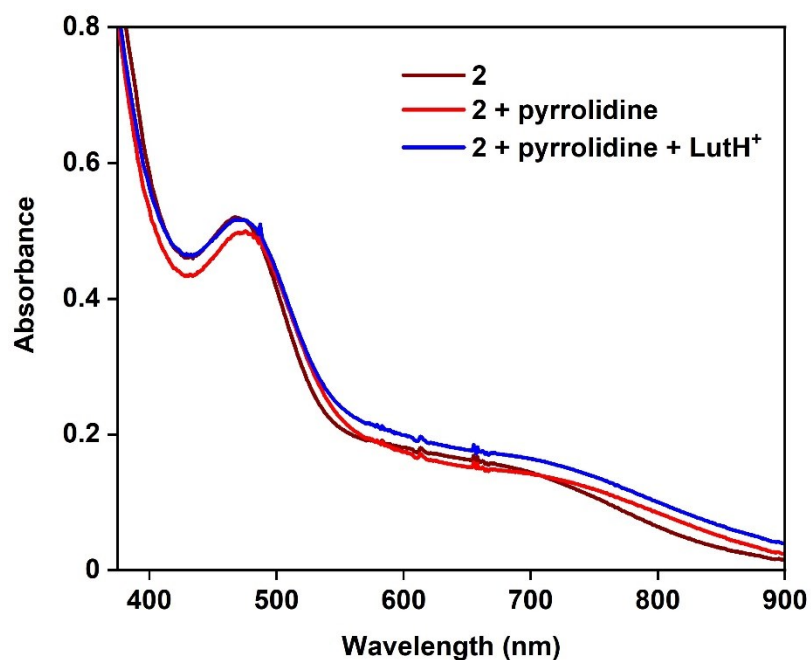

**Figure S31.** UV-Vis spectral change of **2** (0.12 mM) observed upon addition of 1 equiv. of pyrrolidine and followed by addition of 1 equiv. of 2,6-lutidinium triflate (LutH<sup>+</sup>OTf<sup>-</sup>) in acetonitrile at -25 °C.

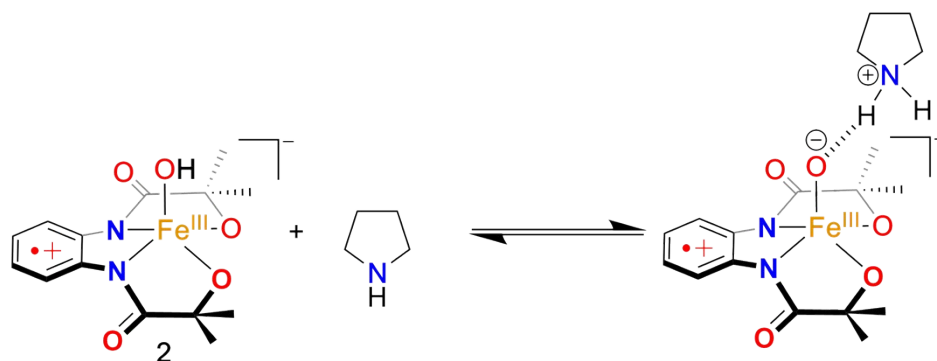

**Scheme S1.** Proposed reaction for the reaction of **2** with pyrrolidine.

**Appendix, Calculation 1:** B3LYP-def2-TZVP, D3BJ

|    |           |          |           |
|----|-----------|----------|-----------|
| Fe | 6.907664  | 7.430969 | 12.820624 |
| O  | 5.269769  | 7.110987 | 11.733571 |
| O  | 6.854397  | 9.282996 | 13.277804 |
| O  | 8.300931  | 7.560673 | 11.546128 |
| N  | 6.229031  | 7.191895 | 14.596013 |
| O  | 5.433074  | 8.345912 | 16.431830 |
| N  | 7.622629  | 5.679532 | 13.134257 |
| O  | 9.260181  | 4.205093 | 12.437224 |
| C  | 8.647969  | 5.284053 | 12.363824 |
| C  | 9.024792  | 6.370083 | 11.325524 |
| C  | 10.524441 | 6.669954 | 11.451755 |
| H  | 10.797670 | 7.435905 | 10.723171 |
| H  | 11.126066 | 5.778793 | 11.266222 |
| H  | 10.751756 | 7.048915 | 12.451054 |
| C  | 8.726477  | 5.820665 | 9.921564  |
| H  | 7.657772  | 5.623162 | 9.812389  |

|   |          |           |           |
|---|----------|-----------|-----------|
| H | 9.275420 | 4.896427  | 9.732889  |
| H | 9.022930 | 6.562651  | 9.176402  |
| C | 7.063753 | 5.018644  | 14.235878 |
| C | 6.275377 | 5.871704  | 15.058106 |
| C | 5.869636 | 8.294720  | 15.270736 |
| C | 6.057348 | 9.563064  | 14.404664 |
| C | 4.656588 | 10.033577 | 13.970946 |
| H | 4.743391 | 10.966096 | 13.407788 |
| H | 4.010066 | 10.204389 | 14.833994 |
| H | 4.196328 | 9.286729  | 13.322293 |
| C | 6.730367 | 10.651473 | 15.245145 |
| H | 7.711007 | 10.315899 | 15.589746 |
| H | 6.127647 | 10.909309 | 16.116557 |
| H | 6.863832 | 11.544990 | 14.631915 |
| C | 5.631375 | 5.351035  | 16.178811 |
| H | 5.037816 | 6.007878  | 16.795231 |
| C | 5.757354 | 3.995677  | 16.488408 |
| H | 5.242840 | 3.596281  | 17.353893 |
| C | 6.535346 | 3.163805  | 15.691915 |
| H | 6.637581 | 2.114445  | 15.941287 |
| C | 7.190348 | 3.670761  | 14.566947 |
| H | 7.793740 | 3.030233  | 13.942478 |
| H | 4.526651 | 7.187323  | 12.342337 |

**Calculation 2:** BP86-def2-TZVP, D3BJ

|    |           |           |           |
|----|-----------|-----------|-----------|
| Fe | 7.082691  | 7.483649  | 12.923952 |
| O  | 5.608850  | 7.223245  | 11.608048 |
| O  | 6.980821  | 9.321438  | 13.404278 |
| O  | 8.586269  | 7.638262  | 11.788995 |
| N  | 6.235147  | 7.192835  | 14.608133 |
| O  | 5.075040  | 8.295421  | 16.302712 |
| N  | 7.735480  | 5.713057  | 13.233160 |
| O  | 9.202878  | 4.121753  | 12.366710 |
| C  | 8.692448  | 5.265753  | 12.388375 |
| C  | 9.087321  | 6.374037  | 11.374739 |
| C  | 10.615514 | 6.448654  | 11.272030 |
| H  | 10.897981 | 7.200078  | 10.519842 |
| H  | 11.042742 | 5.478254  | 10.982447 |
| H  | 11.046820 | 6.744573  | 12.240146 |
| C  | 8.463520  | 5.995027  | 10.016639 |
| H  | 7.368032  | 6.019692  | 10.108842 |
| H  | 8.782532  | 4.993775  | 9.689815  |
| H  | 8.771405  | 6.728728  | 9.255891  |
| C  | 7.138203  | 5.033905  | 14.301716 |
| C  | 6.280977  | 5.873752  | 15.082447 |
| C  | 5.720701  | 8.280814  | 15.229739 |
| C  | 6.023559  | 9.571231  | 14.420014 |
| C  | 4.699013  | 10.043697 | 13.787141 |
| H  | 4.866577  | 10.988781 | 13.248147 |
| H  | 3.920891  | 10.202455 | 14.548553 |
| H  | 4.348277  | 9.291635  | 13.065543 |
| C  | 6.568989  | 10.640595 | 15.377503 |
| H  | 7.521706  | 10.305839 | 15.813525 |
| H  | 5.859848  | 10.840148 | 16.192672 |
| H  | 6.747357  | 11.573946 | 14.823652 |

|   |          |          |           |
|---|----------|----------|-----------|
| C | 5.616085 | 5.343005 | 16.197547 |
| H | 4.971250 | 5.992837 | 16.785060 |
| C | 5.794461 | 3.994141 | 16.539139 |
| H | 5.272144 | 3.587110 | 17.406973 |
| C | 6.632902 | 3.174471 | 15.778135 |
| H | 6.766832 | 2.125693 | 16.050079 |
| C | 7.308326 | 3.688300 | 14.661617 |
| H | 7.969179 | 3.064123 | 14.063703 |
| H | 4.788590 | 7.221985 | 12.133659 |

**Calculation 3:** BLYP-def2-TZVP,D3BJ

|    |           |           |           |
|----|-----------|-----------|-----------|
| Fe | 7.062471  | 7.484984  | 12.904498 |
| O  | 5.561000  | 7.224405  | 11.591344 |
| O  | 6.958464  | 9.336312  | 13.394554 |
| O  | 8.571563  | 7.635332  | 11.750933 |
| N  | 6.219910  | 7.191574  | 14.611898 |
| O  | 5.078093  | 8.298974  | 16.323243 |
| N  | 7.727433  | 5.699041  | 13.218365 |
| O  | 9.214620  | 4.113084  | 12.361925 |
| C  | 8.692519  | 5.255606  | 12.377730 |
| C  | 9.093827  | 6.364280  | 11.354336 |
| C  | 10.629556 | 6.458104  | 11.277849 |
| H  | 10.914002 | 7.214760  | 10.534886 |
| H  | 11.072769 | 5.496099  | 10.992491 |
| H  | 11.038943 | 6.755048  | 12.252819 |
| C  | 8.498252  | 5.968352  | 9.980265  |
| H  | 7.403595  | 5.966022  | 10.049189 |
| H  | 8.844950  | 4.975383  | 9.663617  |
| H  | 8.803360  | 6.705078  | 9.224374  |
| C  | 7.131962  | 5.023983  | 14.298570 |
| C  | 6.276148  | 5.865842  | 15.085355 |
| C  | 5.713371  | 8.281721  | 15.240251 |
| C  | 6.008849  | 9.583526  | 14.430521 |
| C  | 4.674279  | 10.070416 | 13.812067 |
| H  | 4.843686  | 11.012429 | 13.272625 |
| H  | 3.910667  | 10.236592 | 14.583574 |
| H  | 4.305264  | 9.324134  | 13.097495 |
| C  | 6.576475  | 10.650777 | 15.388736 |
| H  | 7.526828  | 10.304703 | 15.815720 |
| H  | 5.877887  | 10.858358 | 16.208099 |
| H  | 6.760984  | 11.579940 | 14.833913 |
| C  | 5.618668  | 5.332777  | 16.206778 |
| H  | 4.977504  | 5.977860  | 16.797723 |
| C  | 5.801248  | 3.982897  | 16.551206 |
| H  | 5.286259  | 3.577947  | 17.421539 |
| C  | 6.637092  | 3.162243  | 15.785164 |
| H  | 6.774566  | 2.116231  | 16.056877 |
| C  | 7.304824  | 3.677020  | 14.661705 |
| H  | 7.959757  | 3.051378  | 14.064556 |
| H  | 4.739714  | 7.263483  | 12.114526 |

**Calculation 4:** PBE-SVP D3BJ

|    |          |          |           |
|----|----------|----------|-----------|
| Fe | 7.172343 | 7.547831 | 12.999769 |
| O  | 5.695605 | 7.396426 | 11.679070 |

|   |           |           |           |
|---|-----------|-----------|-----------|
| O | 7.106516  | 9.369390  | 13.527187 |
| O | 8.735408  | 7.672806  | 11.923458 |
| N | 6.317769  | 7.231298  | 14.692575 |
| O | 5.117720  | 8.345119  | 16.358909 |
| N | 7.728352  | 5.726549  | 13.246413 |
| O | 9.111315  | 4.103498  | 12.292180 |
| C | 8.663090  | 5.267653  | 12.372029 |
| C | 9.099755  | 6.413498  | 11.407671 |
| C | 10.622448 | 6.346598  | 11.218116 |
| H | 10.947546 | 7.080727  | 10.452516 |
| H | 10.934411 | 5.330709  | 10.903412 |
| H | 11.133031 | 6.590234  | 12.172949 |
| C | 8.359135  | 6.164854  | 10.071761 |
| H | 7.278558  | 6.342586  | 10.258845 |
| H | 8.523024  | 5.135717  | 9.688336  |
| H | 8.711651  | 6.890996  | 9.308475  |
| C | 7.120035  | 5.043356  | 14.303660 |
| C | 6.315585  | 5.904649  | 15.131883 |
| C | 5.780153  | 8.322556  | 15.298826 |
| C | 6.062752  | 9.599083  | 14.446829 |
| C | 4.752603  | 9.910222  | 13.683773 |
| H | 4.863914  | 10.864759 | 13.125915 |
| H | 3.882833  | 9.997061  | 14.368122 |
| H | 4.588741  | 9.089520  | 12.953521 |
| C | 6.441345  | 10.751541 | 15.388116 |
| H | 7.416106  | 10.536612 | 15.873569 |
| H | 5.676093  | 10.880749 | 16.179318 |
| H | 6.539512  | 11.698126 | 14.818012 |
| C | 5.656469  | 5.371603  | 16.259725 |
| H | 5.060635  | 6.050188  | 16.883906 |
| C | 5.782720  | 4.000981  | 16.561985 |
| H | 5.264171  | 3.590047  | 17.442891 |
| C | 6.566733  | 3.160343  | 15.752901 |
| H | 6.661972  | 2.090441  | 15.998483 |
| C | 7.239648  | 3.675311  | 14.627018 |
| H | 7.867112  | 3.041640  | 13.986648 |
| H | 5.294552  | 6.541420  | 11.932549 |

**Calculation 5:** BP86- 6-31+G\*, D3BJ

|    |           |          |           |
|----|-----------|----------|-----------|
| Fe | 7.044911  | 7.464086 | 12.896918 |
| O  | 5.568932  | 7.178826 | 11.582902 |
| O  | 6.911590  | 9.307018 | 13.351515 |
| O  | 8.552555  | 7.629945 | 11.763316 |
| N  | 6.206309  | 7.181632 | 14.589388 |
| O  | 5.091360  | 8.287281 | 16.318740 |
| N  | 7.716653  | 5.701826 | 13.213235 |
| O  | 9.246090  | 4.131617 | 12.403995 |
| C  | 8.705143  | 5.264719 | 12.393439 |
| C  | 9.092974  | 6.369440 | 11.369678 |
| C  | 10.622498 | 6.479633 | 11.293795 |
| H  | 10.903531 | 7.240899 | 10.548346 |
| H  | 11.079239 | 5.520222 | 11.005604 |
| H  | 11.035038 | 6.780522 | 12.270585 |



|   |          |           |           |
|---|----------|-----------|-----------|
| C | 8.501806 | 5.963279  | 10.002696 |
| H | 7.402751 | 5.964968  | 10.067628 |
| H | 8.844772 | 4.963454  | 9.689287  |
| H | 8.808878 | 6.693456  | 9.235515  |
| C | 7.128542 | 5.022872  | 14.293847 |
| C | 6.266218 | 5.860951  | 15.075411 |
| C | 5.710130 | 8.273583  | 15.226786 |
| C | 6.000127 | 9.567412  | 14.413573 |
| C | 4.660094 | 10.078405 | 13.842310 |
| H | 4.831550 | 11.008421 | 13.275598 |
| H | 3.929488 | 10.283392 | 14.641505 |
| H | 4.227935 | 9.332928  | 13.155477 |
| C | 6.610331 | 10.619180 | 15.355137 |
| H | 7.572008 | 10.261251 | 15.755691 |
| H | 5.938715 | 10.836665 | 16.199742 |
| H | 6.790930 | 11.553146 | 14.799222 |
| C | 5.607014 | 5.330104  | 16.197866 |
| H | 4.957911 | 5.977058  | 16.787610 |
| C | 5.798090 | 3.981122  | 16.546509 |
| H | 5.280706 | 3.573694  | 17.420223 |
| C | 6.642034 | 3.162407  | 15.784171 |
| H | 6.786431 | 2.113835  | 16.061186 |
| C | 7.310815 | 3.677453  | 14.659700 |
| H | 7.975708 | 3.051670  | 14.064318 |
| H | 4.731555 | 7.388328  | 12.038851 |

**Calculation 6:** B3LYP- 6-31+G\*, D3BJ

|    |           |           |           |
|----|-----------|-----------|-----------|
| Fe | 7.083952  | 7.468623  | 12.914331 |
| O  | 5.673025  | 7.171343  | 11.556931 |
| O  | 6.873400  | 9.299117  | 13.358954 |
| O  | 8.647816  | 7.637318  | 11.841198 |
| N  | 6.208164  | 7.169266  | 14.595353 |
| O  | 5.040544  | 8.250447  | 16.281410 |
| N  | 7.758325  | 5.695987  | 13.235600 |
| O  | 9.379889  | 4.200662  | 12.520804 |
| C  | 8.781116  | 5.290061  | 12.457635 |
| C  | 9.122441  | 6.376711  | 11.400296 |
| C  | 10.634647 | 6.450387  | 11.181393 |
| H  | 10.853455 | 7.208362  | 10.423289 |
| H  | 11.035621 | 5.494099  | 10.836925 |
| H  | 11.146530 | 6.731406  | 12.106320 |
| C  | 8.416315  | 5.983397  | 10.084947 |
| H  | 7.334047  | 6.035329  | 10.218535 |
| H  | 8.695504  | 4.977051  | 9.757413  |
| H  | 8.696725  | 6.690544  | 9.297639  |
| C  | 7.163774  | 5.024726  | 14.315124 |
| C  | 6.269990  | 5.847349  | 15.066706 |
| C  | 5.679592  | 8.243778  | 15.212705 |
| C  | 5.967702  | 9.544441  | 14.418314 |
| C  | 4.633246  | 10.076995 | 13.865049 |
| H  | 4.813096  | 10.995912 | 13.299147 |
| H  | 3.924697  | 10.297081 | 14.668315 |

|   |          |           |           |
|---|----------|-----------|-----------|
| H | 4.174841 | 9.347916  | 13.190112 |
| C | 6.586119 | 10.577064 | 15.369054 |
| H | 7.520216 | 10.194125 | 15.790358 |
| H | 5.911134 | 10.823307 | 16.191838 |
| H | 6.809252 | 11.491795 | 14.812533 |
| C | 5.569890 | 5.307646  | 16.152187 |
| H | 4.887413 | 5.936276  | 16.706038 |
| C | 5.776696 | 3.972030  | 16.517467 |
| H | 5.231819 | 3.558585  | 17.360679 |
| C | 6.671856 | 3.176474  | 15.804828 |
| H | 6.837857 | 2.144674  | 16.098429 |
| C | 7.366924 | 3.697606  | 14.706060 |
| H | 8.058925 | 3.083600  | 14.146830 |
| H | 4.854803 | 7.605211  | 11.830572 |

## References

1. E. S. Jang, C. L. McMullin, M. Kass, K. Meyer, T. R. Cundari and T. H. Warren, *J. Am. Chem. Soc.*, 2014, **136**, 10930-10940.
2. J. Y. Lee, R. L. Peterson, K. Ohkubo, I. Garcia-Bosch, R. A. Himes, J. Woertink, C. D. Moore, E. I. Solomon, S. Fukuzumi and K. D. Karlin, *J. Am. Chem. Soc.*, 2014, **136**, 9925-9937.
3. C. Hansch, A. Leo and R. W. Taft, *Chem. Rev.*, 1991, **91**, 165-195.
4. S. K. Sur, *J. Magn. Reson.*, 1989, **82**, 169-173.
5. G. A. Bain and J. F. Berry, *J. Chem. Educ.*, 2008, **85**, 532-536.
6. X. Lu, X.-X. Li, M. S. Seo, Y.-M. Lee, M. Clemancey, P. Maldivi, J.-M. Latour, R. Sarangi, S. Fukuzumi and W. Nam, *J. Am. Chem. Soc.*, 2019, **141**, 80-83.
7. APEX II 2009 Ed.; Bruker Analytical X-ray Systems Inc.: Madison, WI, 2009
8. G. M. Sheldrick, *Acta Crystallogr., Sect. A Found. Crystallogr.*, 2008, **A64**, 112-122.
9. M. N. Burnett and C. K. Johnson, ORTEP-III, Oak Ridge Thermal Ellipsoid Plot Program for Crystal Structure Illustrations, Report ORNL-6895, Oak Ridge National Laboratory, Oak Ridge, TN, USA, 1996
10. C. F. Macrae, I. J. Bruno, J. A. Chisholm, P. R. Edgington, P. McCabe, E. Pidcock, L. Rodriguez-Monge, R. Taylor, J. van de Streek and P. A. Wood, *J. Appl. Crystallogr.*, 2008, **41**, 466-470.
11. M. Gupta, Y. Kumar, A. Tayal, N. Pandey, W. Caliebe and J. Stahn, *SN Applied Sciences*, 2019, **2**, 41.
12. B. Ravel and M. Newville, *J. Synchrotron Rad.*, 2005, **12**, 537-541.
13. J. J. Rehr and R. C. Albers, *Rev. Mod. Phys.*, 2000, **72**, 621-654.
14. D. C. Koningsberger and R. Prins, *X Ray Absorption: Principles, Applications, Techniques of EXAFS, SEXAFS and XANES*, John Wiley & Sons, 1988.
15. M. Wojdyr, *J. Appl. Crystallogr.*, 2010, **43**, 1126-1128.
16. S. Pattanayak, A. J. Jasniewski, A. Rana, A. Draksharapu, K. K. Singh, A. Weitz, M. Hendrich, L. Que, A. Dey and S. Sen Gupta, *Inorg. Chem.*, 2017, **56**, 6352-6361.
17. F. Neese, *Wiley Interdisciplinary Reviews: Computational Molecular Science*, 2012, **2**, 73-78.
18. A. D. Becke, *J. Chem. Phys.*, 1993, **98**, 5648-5652.
19. P. J. Stephens, F. J. Devlin, C. F. Chabalowski and M. J. Frisch, *The Journal of Physical Chemistry*, 1994, **98**, 11623-11627.
20. F. Weigend and R. Ahlrichs, *Phys. Chem. Chem. Phys.*, 2005, **7**, 3297-3305.
21. S. Grimme, J. Antony, S. Ehrlich and H. Krieg, *J. Chem. Phys.*, 2010, **132**, 154104.

22. S. Grimme, S. Ehrlich and L. Goerigk, *J. Comput. Chem.*, 2011, **32**, 1456-1465.
23. A. D. Becke, *Physical Review A*, 1988, **38**, 3098-3100.
24. J. P. Perdew, *Physical Review B*, 1986, **33**, 8822-8824.
25. C. Lee, W. Yang and R. G. Parr, *Physical Review B*, 1988, **37**, 785-789.
26. R. Krishnan, J. S. Binkley, R. Seeger and J. A. Pople, *J. Chem. Phys.*, 1980, **72**, 650-654.
27. P. Graf, E. L. Mehler, A. D. McLean and G. S. Chandler, *J. Chem. Phys.*, 1982, **76**, 1593-1594.
28. L. A. Curtiss, P. C. Redfern, V. Rassolov, G. Kedziora and J. A. Pople, *J. Chem. Phys.*, 2001, **114**, 9287-9295.
29. M. J. Frisch, J. A. Pople and J. S. Binkley, *J. Chem. Phys.*, 1984, **80**, 3265-3269.
30. L. A. Curtiss, M. P. McGrath, J. P. Blaudeau, N. E. Davis, R. C. B. Jr. and L. Radom, *J. Chem. Phys.*, 1995, **103**, 6104-6113.
31. V. Barone and M. Cossi, *J. Phys. Chem. A*, 1998, **102**, 1995-2001.
32. S. Kossmann and F. Neese, *J. Chem. Theory Comput.*, 2010, **6**, 2325-2338.
33. M. A. Lockwood, T. J. Blubaugh, A. M. Collier, S. Lovell and J. M. Mayer, *Angew. Chem., Int. Ed.*, 1999, **38**, 225-227.
34. E. Lansky David and P. Goldberg David, *Inorg Chem*, 2006, **45**, 5119-5125.
35. S. Miyazaki, T. Kojima, J. M. Mayer and S. Fukuzumi, *J. Am. Chem. Soc.*, 2009, **131**, 11615-11624.
36. D. T. Y. Yiu, M. F. W. Lee, W. W. Y. Lam and T.-C. Lau, *Inorg. Chem.*, 2003, **42**, 1225-1232.
37. M. Lucarini, P. Pedrielli, G. F. Pedulli, S. Cabiddu and C. Fattuoni, *J. Org. Chem.*, 1996, **61**, 9259-9263.
